# 1 **Compartmentalization of mRNAs in the giant,** 2 **unicellular green algae *Acetabularia acetabulum***

3

## 4 ***Authors***

5 Ina J. Andresen<sup>1</sup>, Russell J. S. Orr<sup>2</sup>, Kamran Shalchian-Tabrizi<sup>3</sup>, Jon Bråte<sup>1\*</sup>

6

## 7 ***Address***

8 1: Section for Genetics and Evolutionary Biology, Department of Biosciences, University of  
9 Oslo, Kristine Bonnevis Hus, Blindernveien 31, 0316 Oslo, Norway.

10 2: Natural History Museum, University of Oslo, Oslo, Norway

11 3: Centre for Epigenetics, Development and Evolution, Department of Biosciences, University  
12 of Oslo, Kristine Bonnevis Hus, Blindernveien 31, 0316 Oslo, Norway.

13

## 14 ***\*Corresponding author***

15 Jon Bråte, jon.bråte@ibv.uio.no

16

## 17 ***Keywords***

18 *Acetabularia acetabulum*, Dasycladales, UMI, STL, compartmentalization, single-cell, mRNA.

19

## 20 **Abstract**

21 *Acetabularia acetabulum* is a single-celled green alga previously used as a model species for  
22 studying the role of the nucleus in cell development and morphogenesis. The highly elongated  
23 cell, which stretches several centimeters, harbors a single nucleus located in the basal end.  
24 Although *A. acetabulum* historically has been an important model in cell biology, almost  
25 nothing is known about its gene content, or how gene products are distributed in the cell. To  
26 study the composition and distribution of mRNAs in *A. acetabulum*, we have used quantitative  
27 RNA-seq to sequence the mRNA content of four sections of adult *A. acetabulum* cells. We  
28 found that although mRNAs are present throughout the cell, there are large pools of distinct  
29 mRNAs localized to the different subcellular sections. Conversely, we also find that gene  
30 transcripts related to intracellular transport are evenly distributed throughout the cell. This  
31 distribution hints at post-transcriptional regulation and selective transport of mRNAs as  
32 mechanisms to achieve mRNA localization in *A. acetabulum*.

## 33 Introduction

34 Large and complex morphological forms are predominantly found among multicellular  
35 organisms such as animals, plants and kelps. However, also several single celled organisms  
36 have elaborate cellular morphologies, and it has therefore been previously argued that  
37 multicellularity is not a requirement for the formation of structural complexity (Kaplan, 1992;  
38 Kaplan et al., 1991; Niklas et al., 2013; Ranjan et al., 2015). By subcellular  
39 compartmentalization of RNA or proteins, single-celled organisms can chamber their bodies  
40 into differently shaped subunits, further facilitating development of sophisticated body plans  
41 without cellularization (Kaplan, 1992; Kaplan et al., 1991; Niklas et al., 2013). The green algae  
42 order Dasycladales harbors multiple examples of single-celled species with highly elaborate  
43 and complex cellular morphologies. With only a single nucleus, these algae have evolved into  
44 numerous morphological forms, and can grow up to 20 cm long (Berger, 1990, 2006).

45  
46 Being used as a model organism to study the link between genetics and cellular development,  
47 *Acetabularia acetabulum* is the most studied dasycladalean species. This alga is a tropical,  
48 marine species found in shallow waters in the Mediterranean Sea, Northern Africa and South-  
49 West Asia. Divers often refer to *A. acetabulum* as “mermaids wineglass” because of its  
50 distinctive morphology; the basal rhizoid, which hosts the nucleus as well as ensuring anchoring  
51 of the cell to a substrate, is followed by a naked, elongated stalk with a slightly concave and  
52 disc-looking structure (cap), at the apical end (Figure 1A).

53  
54 Through his ground breaking amputation and grafting experiments, Joachim Hämmerling was  
55 the first to identify the presence of substances controlling the subcellular morphogenesis of *A.*  
56 *acetabulum* (Hämmerling, 1934a, 1934b; Hämmerling, 1953). He also showed that these  
57 substances were distributed in gradients, with the highest accumulation at the cap and rhizoid  
58 regions (Hämmerling, 1934c; Hämmerling, 1963). These morphogenetic substances were later  
59 shown to consist of mRNA (Baltus et al., 1968; Garcia et al., 1986; Kloppstech, 1977; Naumova  
60 et al., 1976), but the content of the RNA gradient, and whether it was composed of  
61 homogeneously or differentially distributed RNA transcripts was not known.

62  
63 A few studies have tried to decipher the RNA gradient in *A. acetabulum*. Naumova et al. (1976)  
64 argued that the gradient was due to differential metabolism of chloroplast ribosomal RNA along  
65 the cell rather than differential transportation of nuclear mRNA. A more recent study by Vogel

66 et al. (2002) examined the expression of 13 house-keeping genes and found differential  
67 accumulation of several gene transcripts, where some transcripts seemed to accumulate in the  
68 rhizoid, some in the cap, while others were evenly distributed along the cellular body. Serikawa  
69 et al. (1999) demonstrated that the *A. acetabulum*-specific homeobox-containing gene,  
70 *Aaknox1*, shifted localization from being evenly distributed during vegetative growth, to basal  
71 accumulation in the final stages of the *A. acetabulum* life cycle. And both the transcripts  
72 encoding carbonic anhydrases as well as their translated protein products were shown to be co-  
73 localized in the apical parts of adult *A. acetabulum* cells (Serikawa et al., 2001), indicating that  
74 localization of mRNA is a mechanism for correct localization of protein. Altogether, these  
75 studies suggested that subcellular localization of mRNA is common in the *A. acetabulum* cell,  
76 and an important mechanism for establishment of subcellular structures.

77  
78 mRNA localization has also been demonstrated in another gigantic single-celled green algal  
79 genus, *Caulerpa* (Arimoto et al., 2019; Ranjan et al., 2015). These single-celled organisms  
80 contain hundreds of nuclei distributed across the cell and the localization of mRNA is achieved,  
81 at least in part, by differential nuclear transcriptional regulation in the different parts of the cell  
82 (Arimoto et al., 2019). Unlike *Caulerpa*, *A. acetabulum* has only a single nucleus (located in  
83 the basal rhizoid) and clearly the mechanisms behind the subcellular localization of mRNAs,  
84 and ultimately the establishment of the cellular body plan, must be different. Although these  
85 mechanisms are unknown, there are several indications that mRNAs are actively transported  
86 along the cytoskeleton in *A. acetabulum*. Kloppstech et al., (1975a and 1975b) showed that  
87 ribosomal- and polyadenylated RNA travel with different speeds in *A. acetabulum*, and that  
88 polyadenylated RNA moved with a speed of 0.2  $\mu\text{m/s}$ , which is much faster than movement  
89 with normal diffusion, suggesting that RNA transportation is both active and specific. Further,  
90 staining experiments performed on *A. peniculus* showed that actin proteins and polyadenylated  
91 RNAs were co-localized, and that treatment with cytochalasin D (inhibitor of actin  
92 polymerization) lead to a disruption of already established mRNA gradients (Mine et al., 2001).  
93 These findings supported the theory that the cytoskeleton is involved in polar transportation of  
94 mRNAs in *Acetabularia* species (Vogel et al., 2002).

95  
96 The studies on the expression and localization of mRNAs in *A. acetabulum* has so far only been  
97 performed on a restricted number of genes, and it is not known how general this phenomenon  
98 is, and how gene localization is related to the observed gradients of RNA along the cell. We  
99 have therefore in this study characterized the expression profile of all mRNAs in adult *A.*

100 *acetabulum* cells. To achieve this, we have exploited recent developments in single-cell RNA-  
101 seq technology which allowed us to quantitatively sequence mRNAs from four subcellular  
102 sections of the cell, the upper and lower parts of the stalk, and the rhizoid (Figure 1A). We  
103 investigate whether subcellular compartmentalization is a general phenomenon for all types of  
104 mRNAs in *A. acetabulum*, and whether the distribution of mRNAs can be coupled to the  
105 formation of body plan and the complex cellular morphology of this algae.

106  
107

## 108 **Methods**

109

### 110 **Culturing *Acetabularia acetabulum* cells**

111 *A. acetabulum* cells were cultured in cell/tissue culture flasks in Dasycladales Seawater  
112 Medium prepared after the recipe of UTEX Culture Collection of Algae at The University of  
113 Texas at Austin ([https://utex.org/products/dasycladales-seawater-  
114 medium?variant=30991770976346](https://utex.org/products/dasycladales-seawater-medium?variant=30991770976346)). The medium was changed biweekly, and the algae were  
115 kept in incubators with a 12/12h light/dark cycle (light intensity of 2500 lux) with a constant  
116 temperature of 20°C.

117

### 118 **Dissection of cells and RNA isolation**

119 The *A. acetabulum* cells were 5-8 cm long with fully grown caps, but no apparent gametes in  
120 the gametangia, and no whorls along the stalk (Figure 1A). The cells were washed three times  
121 in 1X PBS to remove residues from the medium, and dissected into four subcellular regions;  
122 the “cap” (incision about 2 mm from the apical tip or just below the cap), “rhizoid” (incision  
123 about 2 mm above the rhizoid), “upper stalk” (the upper half of the stalk) and “lower stalk” (the  
124 lower half of the stalk). Dissection was carried out in dry petri dishes to limit cytoplasmic loss,  
125 and new, sterile scalpels were used between incision. Subcellular regions from 5 – 8 adult cells  
126 were pooled together to achieve sufficient RNA quantities. The procedure was repeated to  
127 create seven replicates of RNA extraction. The subcellular samples are numbered according to  
128 which batch of cells they originate from, e.g. the samples named “Cap 19” and “Rhizoid 19”  
129 are the cap- and rhizoid sections from the same batch of individuals (batch19).

130

131 The dissected pieces were transferred to green MagNA Lyser Green Beads (Roche Life  
132 Science, Germany), containing lysis buffer (see below), and flash frozen in liquid nitrogen.

133 RNA from 3 batches (batch 17, 19 and 25) was isolated using the “Single Cell RNA Purification  
134 Kit” (NORGEN BIOTEK CORP, Canada) with an 8 ul elution buffer. RNA from the remaining  
135 4 batches (batch 26, 27, 45 and 46) was isolated using the “Total RNA Purification Kit”  
136 (NORGEN BIOTEK CORP, Canada) with 40 ul elution. RNA quality and quantity were  
137 inspected on the Agilent 2100 Bioanalyzer using the Agilent RNA 6000 Pico kit (Agilent  
138 Technologies, Inc, Germany).

139

## 140 **Library preparation and sequencing**

141 ERCC RNA Spike-In Mix I (ThermoFisher Scientific, Massachusetts, USA) was added to each  
142 sample before mRNA enrichment. The amount of added ERCC Spike-In Mix was adjusted to  
143 the amount of RNA in each sample, according to the manufacture’s protocol. mRNA  
144 enrichment was performed using NEXTflex™ Poly(A) Beads (BIOO Scientific Corporation,  
145 Texas, USA) before library preparation with the NEXTflex Rapid Directional qRNA-Seq  
146 Library Prep kit for Illumina sequencing (BIOO Scientific Corporation, Texas, USA). This  
147 library preparation kit assigns a unique molecular identifier (UMI), or Stochastic Label (STL),  
148 to both ends of the mRNA fragments after enzymatic fragmentation, but before cDNA synthesis  
149 and amplification. This allows for distinguishing between PCR duplicates and true identical  
150 sequences which map to the same loci, ensuring a better quantitative representation of the  
151 original number of mRNA fragments in the samples than standard RNA-seq library protocols  
152 without UMI-labelling (Toloue et al., 2013). A total of 30 PCR cycles were run for sample  
153 17.1-4, 25 cycles were run for sample 25.4 and 26.4, and 20 cycles were run for sample 19.1-  
154 4, 25.1-3, 26.1-3, 27.1-4, 45.1-4 and 46.1-4 to create libraries of approximately equal quantities  
155 as measured by gel electrophoresis.

156

157 The 28 libraries were sequenced on the Illumina HiSeq4000 platform producing 150 bp Paired-  
158 End sequences (with an insert size of 350 bp). The sequencing was performed at the Norwegian  
159 Sequencing Centre ([www.sequencing.uio.no](http://www.sequencing.uio.no)) at the University of Oslo.

160

## 161 ***De novo* transcriptome assembly and annotation**

162 In order to obtain a complete transcriptome representing as many transcripts as possible to use  
163 for gene quantification, the resulting sequences from the 28 adult sequence libraries were  
164 assembled together with 20 transcriptome sequence libraries from various developmental stages  
165 of *A. acetabulum* (unpublished data generated by our research group). Briefly, the assembly

166 was performed by first removing the nine first UMI bases of each sequence (from the 5' end)  
167 with Trimmomatic v/0.35 (Bolger et al., 2014). Further, the 3'-adaptor sequences, and low-  
168 quality sequences (phred score < 20) were trimmed. Only sequences longer than 36 bp were  
169 retained. An additional trimming with TrimGalore v/0.3.3  
170 ([http://www.bioinformatics.babraham.ac.uk/projects/trim\\_galore/](http://www.bioinformatics.babraham.ac.uk/projects/trim_galore/)) was performed to remove  
171 any remaining adaptor sequences. ERCC RNA spike-ins were removed from the data set by  
172 mapping the reads to the known ERCC RNA spike-in sequences using Bowtie 2 v/2.2.9  
173 (Langmead et al., 2012). A total of 2,095,599,508 paired end reads (1,047,799,754 pairs) were  
174 obtained after preprocessing and used for transcriptome assembly. *De novo* assembly was  
175 performed using Trinity v/2.5.1 (Grabherr et al., 2011). To reduce the number of possible  
176 mapping sites in downstream analysis, the transcriptome was reduced to the highest expressed  
177 isoform for each gene. These isoforms were found by subsampling 10% of the sequenced reads  
178 of every sample using the BMap package (Bushnell, 2015), mapping them to the trinity  
179 assembly, and further extracting the isoforms with the highest coverage. Transcripts encoded  
180 by the chloroplast- and mitochondrial genome were identified by Megablast against a  
181 chloroplast database containing chloroplast genomes from 59 published green algae species,  
182 and a database containing mitochondrial genomes from 24 published green algae species (Table  
183 S1 and S2). Transcripts giving significant hits against the databases were further examined by  
184 Megablast against the NCBI Nucleotide collection database in order to exclude possible  
185 prokaryote contamination. Transcripts with no hits to either the plastid and mitochondrial  
186 databases were considered as nuclear encoded. As mRNA enrichment with poly(A) beads does  
187 not remove rRNA completely, rRNA transcripts were identified by Megablast against complete  
188 or partial 18S, 28S and 5.8S sequences from 20 green algae species (Table S3).

189  
190 Transcriptome completeness was assessed by BUSCO v3.0 (Simao et al., 2015) analysis against  
191 the Chlorophyta and Eukaryote datasets. Since nuclear genes of *A. acetabulum* have an  
192 alternative codon usage, where TGA is the only stop codon, and TAA and TAG instead encodes  
193 glutamine (Jukes, 1996; Schneider et al., 1989), the alternative genetic code (translation table  
194 6: Ciliate, Dasycladaen and Hexamita Nuclear Code ) was used during BUSCO evaluation.

195  
196 TransDecoder v/3.0.0 (Haas et al., 2013) was used to predict coding regions. Translation table  
197 6 was used to translate nuclear encoded transcripts, translation table 16 (Chlorophycean  
198 Mitochondrial Code) was used to translate mitochondrial encoded transcripts and translation  
199 table 1 (Universal Code) was used to translate chloroplast encoded transcripts. Translation table



200 1 was also used for transcripts matching both the chloroplast and the mitochondrial database.  
201 The minimum peptide length was set to 70 amino acids, and the single best ORF per transcript  
202 Predicted peptide sequences were further annotated with the eggNOG-mapper v/5.0 (Huerta-  
203 Cepas et al., 2017; Huerta-Cepas et al., 2019).

204

## 205 **Gene expression quantification, normalization and sample clustering**

206 In order to quantify the gene expression, processed reads (after removing UMI's and low quality  
207 bases) were mapped to the transcriptome (the highest expressed isoform of each gene) with  
208 Bowtie2 v/2.2.9 (Langmead et al., 2012) and gene count files were generated using dqRNASeq  
209 (<https://github.com/e-hutchins/dqRNASeq>), a Unix script, developed for analyzing sequence  
210 data obtained with the NEXTflex Rapid Directional qRNA-Seq Library Prep kit. By using the  
211 resulting mapping file, together with the raw unprocessed reads, the script collapses paired  
212 reads with identical start- and stop sites *and* identical UMIs (assumed PCR duplicates) and  
213 count these as one, while fragments with identical start- and stop sites but different UMIs are  
214 counted individually (these are assumed to originate from different RNA fragments).

215

216 The plotCountDepth function in the SCnorm R package (Bacher et al., 2017) was used to  
217 calculate and visualize the relationship between sequencing depth and gene counts across  
218 samples. For the highest expressed genes (i.e. carrying the most robust signal) there was a  
219 positive relationship between sequencing depth and gene expression, and we therefore  
220 continued with the normalization procedure in the DESeq2 package (Love et al., 2014). To  
221 reduce the computational burden, we filtered the transcripts to have a minimum count of 1 (raw  
222 count) in at least 4 samples before DESeq2 normalization (these would not have affected the  
223 downstream statistical analysis as they would have been filtered out anyway).

224

225 To compare the similarity between samples based on the overall variation in transcript  
226 abundance, the normalized counts were transformed using the variance stabilizing  
227 transformation (VST) function in DESeq2 and the samples were clustered/visualized with PCA  
228 plots using the ggplot2 package (Wickham, 2016).

229

## 230 **Differential transcript abundance estimation**

231 A Wald test (implemented in DESeq2), performed pairwise between the different subcellular  
232 compartments, was used to identify transcripts with differential abundance between at least two

233 subcellular compartments. DESeq2 normalized read counts was used as input for the test. The  
234 batch origin of each sample was added as a blocking factor in the test (added to the design  
235 formula) to take into account any potential influence on the gene counts. Transcripts with  
236 adjusted p-value  $< 0.05$  were considered as significantly differentially abundant (DE). Only  
237 nuclear encoded mRNAs were used in the DE test.

238

239 A Venn diagram was constructed using the systemPipeR package in R (Backman et al., 2016)  
240 to visualize and compare the DE transcripts of each subcellular compartment. To visualize and  
241 plot DE transcripts based on expression levels, the raw counts were converted to CPM's (count  
242 per million) followed by TMM normalization (Trimmed Mean of M-values) using the edgeR  
243 package in R (McCarthy et al., 2012; Robinson et al., 2010). The mean expression values were  
244 further scaled and clustered in a heatmap using the Pheatmap package in R ([https://CRAN.R-](https://CRAN.R-project.org/package=pheatmap)  
245 [project.org/package=pheatmap](https://CRAN.R-project.org/package=pheatmap)).

246

## 247 **GO-enrichment analysis**

248 GO-terms provided by EggNOG were converted to GO-slim with OmicsBox  
249 (<https://www.biobam.com/omicsbox>), and GO-enrichment analysis on the differentially  
250 distributed transcripts unique to the cap, upper stalk, lower stalk and rhizoid were performed  
251 using the R package Goseq (Young et al., 2010). In addition, the stalk samples were analyzed  
252 together by combining the uniquely differentially distributed transcripts from the upper- and  
253 lower stalk samples, as well as the differentially distributed transcripts shared between them.  
254 Lists of the unique transcripts from each subcellular compartment were extracted and inputted  
255 into Goseq, together with a list of transcript lengths, to account for any bias introduced from  
256 transcript length variation (longer transcripts might be easier to annotate or could receive more  
257 GO-annotations than shorter transcripts). GO-terms with a false discovery rate (FDR)  $< 0.05$   
258 were considered enriched. The “hit percentage” of each enriched GO-term within a subcellular  
259 compartment was calculated as the percentage of differentially distributed transcripts in a given  
260 GO-category compared to the number of transcripts in the transcriptome in the same GO-  
261 category. The hierarchical organization of the different enriched GO-terms were explored using  
262 the Mouse Genome Informatics web page  
263 ([http://www.informatics.jax.org/vocab/gene\\_ontology](http://www.informatics.jax.org/vocab/gene_ontology)). Heatmaps of GO terms showing the hit  
264 percentage of significantly enriched GOs was constructed using the ComplexHeatmap package  
265 in R (Gu et al., 2016), with a suitable number of K-means row-splitting. Row\_km\_repeats was  
266 set to 100, which runs clustering multiple times and outputs the consensus cluster.



267

## 268 **Annotation of transcripts related to intracellular transport and localization**

269 Transcripts related to cytoskeletal components (Actin, Tubulin and related genes) and  
270 cytoskeletal motor proteins (Myosins, Dyneins and Kinesins), and poly(A) polymerases, were  
271 extracted from the eggNOG annotation. Homologs of genes related to cellular transport (COP  
272 and Clathrin) were identified by reciprocal blast by using annotated genes in NCBI RefSeq  
273 from *Chlamydomonas reinhardtii* as queries (see Table S4 for queries) against the *A.*  
274 *acetabulum* transcriptome (blastp value cutoff < 0.0001). The resulting hits of the *A.*  
275 *acetabulum* transcriptome were searched against Swissprot using blastp (evalue < 0.0001).  
276 Transcripts which did not produce hits against Swissprot of the same category as in the first  
277 blast search were discarded. Transcripts with a mean TMM-normalized CPM > 1 across all  
278 samples were plotted, with standard error, using the R package ggplot2.

279

## 280 **Comparative transcriptomics between *A. acetabulum* and *Caulerpa taxifolia***

281 The *Caulerpa taxifolia* transcriptome (Ranjan et al., 2015) was translated into amino acid  
282 sequences using Transdecoder v/3.0.0. Orthologous protein sequences between *A. acetabulum*  
283 and *C. taxifolia* were identified using Orthofinder v/2.3.3 (Emms et al., 2015). RSEM generated  
284 gene expression data from six different subcellular compartments of *C. taxifolia* (frond apex,  
285 pinnules, rachis, frond base, stolon and holdfast) was downloaded from the supplementary  
286 datafiles of Ranjan et al. (2015). The counts were rounded to the nearest integer and converted  
287 to TMM-normalized counts (as described above). The TMM counts from the single-copy  
288 orthologs from the different subcellular compartments of *A. acetabulum* and *C. taxifolia* were  
289 merged and the differences in sample variation was visualized using the precomp function in R  
290 and the ggplot2 R package.

291

## 292 **Results**

### 293 **Subcellular RNA isolation, sequencing and read processing**

294 The highest amount of total RNA was extracted from the cap samples (average of 252 ng),  
295 followed by the upper stalk samples (average of 76 ng), the lower stalk (average of 46 ng), with  
296 the lowest amount extracted from the rhizoid samples (average of 45 ng) (Table 1 and Figure  
297 1B. The highest yield of total RNA was obtained using the “Total RNA purification kit” with  
298 an elution volume of 40 ul (used for batch 26, 27, 45 and 46), which gave approximately four  
299 times as much total RNA compared to the “Single Cell RNA purification kit” with an elution

300 volume of 10 ul (used for batch 17, 19 and 25) (Table S5). But still, the relative amounts of  
301 RNA isolated from the different samples were the same regardless of the isolation kit.

302

303 The sequence reads from batch 17 had overall very low-quality scores as well as a high number  
304 of duplicates (mostly from sequencing the adapters). Therefore, very few sequences were  
305 retained after filtering and almost no genes were detected in these samples. The samples from  
306 batch 17 were therefore discarded from further analyses. Between 14 and 43 million raw read  
307 pairs were produced from each of the remaining 24 samples. Quality trimming and removal of  
308 unpaired reads after trimming reduced the numbers by 13-25% for the majority of samples,  
309 except for the Rhizoid of batch 26 and 27, where trimming reduced the number of reads by 40  
310 and 49% (Table 1). Still, more than 15 million read pairs were left for these samples.

311

## 312 **Transcriptome assembly and annotation**

313 Assembling reads *de novo* produced an assembly consisting of 246,083 ‘genes’, or transcripts,  
314 with a total of 429,781 different isoforms (Table S6), where the longest transcript was 17,196  
315 bp and the shortest 201 bp. 245,334 transcripts were considered nuclear encoded, 389  
316 transcripts gave hits against the chloroplast database and were considered to be chloroplast  
317 encoded, 99 transcripts gave hits against the mitochondrial database and were considered  
318 mitochondrial encoded. 261 gave hits against both the chloroplast and mitochondrial databases  
319 and were considered as possible prokaryotic/unclassified transcripts as they also gave BLAST  
320 hits against prokaryotic sequences against NCBI nr. 114,146 transcripts were predicted as  
321 protein coding. Of these, 113,900 belonged to the nuclear genes, 178 to the chloroplast, and 68  
322 to the mitochondria. 38,131 transcripts gave ortholog hits when analyzed by EggNOG, of where  
323 18 779 transcripts were assigned GO-terms.

324

325 Assessing the presence of conserved eukaryotic genes in the transcriptome with a BUSCO  
326 analysis estimated a ~96% completeness based on a pan-eukaryotic dataset and a ~70%  
327 completeness based on a Chlorophyta dataset (Table 2). The pan-eukaryote dataset is much  
328 smaller than the Chlorophyta dataset (303 genes vs. 2168 genes), which probably explains the  
329 differences in the fraction of genes found. Nevertheless, these results indicate that our *de novo*  
330 assembled transcriptome has captured the majority of the expressed genes in *Acetabularia*.

331

332

### 333 **RNA distribution**

334 For all 24 samples, more than 70% of the trimmed read pairs mapped to the transcriptome  
335 (Table 1). There was no correlation between the number of mapped reads and the total UMI  
336 count (Table 1), illustrating the extent of PCR duplication in the sequence libraries and the  
337 importance of using UMIs. The majority of expressed transcripts were lowly expressed and 40-  
338 50% of the expressed transcripts had a count of two or less.

339

340 The total UMI counts follow the same distribution as the amount of isolated total RNA, with  
341 highest numbers in the cap samples and decreasing towards the rhizoid (Figure 1B and C). As  
342 the dissected cap pieces were larger than the other pieces, it is also expected that the cap samples  
343 contain the most RNA. However, as the same amount of RNA is sequenced from each library,  
344 the size of the pieces, or the amount of isolated total RNA, cannot explain the higher count  
345 values in the cap. This rather indicates a greater diversity, or heterogeneity, of transcripts in the  
346 cap libraries compared to the other libraries.

347

348 While the nuclear encoded mRNAs had the same distribution as the total RNA, i.e. decreasing  
349 towards the rhizoid (Figure S1A), ribosomal RNAs were roughly evenly distributed between  
350 the different samples, although with a few extreme outliers (Figure S1B). Transcripts  
351 presumably originating from the chloroplast were also distributed in an apical-basal gradient  
352 (Figure S1C). Mitochondrial transcripts had the highest counts in the cap and the rhizoid (Figure  
353 S1D), however these genes were much more variable between the samples and the counts were  
354 also overall much lower and therefore more subjected to stochastic variation.

355

356 The principal component analysis (PCA) of the count variation between samples shows that the  
357 samples largely cluster according to the cell apical-basal axis along PC1 (Figure 1D). This  
358 shows that the cap- and the rhizoid are the least similar in transcript composition, while the two  
359 stalk samples largely overlap and are fairly similar in terms of transcript expression. However,  
360 there also seem to be a slight tendency that the samples cluster along PC2 according to which  
361 batch they originate from (e.g. batch 19) or which RNA isolation method was used (e.g. batch  
362 19 and 25 vs. batch 26, 27, 25 and 46). This indicates that also which batch of cells the samples  
363 originated from (i.e. sampled at the same time), or which RNA isolation kit was used also  
364 affects the sample variation.

365

366 **Table 1. Total RNA isolation and mRNA sequencing of subcellular fragments of *Acetabularia***  
 367 ***acetabulum*.** The naming of samples is described in the text. Read numbers are given as pairs of reads  
 368 (single reads were discarded), both before and after trimming. Mapping rate describes the percentage of  
 369 paired reads mapping concordantly (i.e. mapping in the expected orientation relative to each other) to  
 370 the *de novo* assembled transcriptome, total UMI count is the sum of transcript expression levels for each  
 371 sample after removing PCR duplicates. Expressed transcripts shows the number of transcripts with at  
 372 least one UMI count. % of expressed transcripts with count  $\leq 2$  is the percentage of “low count”  
 373 transcripts.

| Subcellular compartment | Batch | Total RNA (ng) | Raw reads (PE) | Trimmed reads (PE) | Mapped read pairs | Mapping rate (%) | Total UMI count | Expressed transcripts | % of transcripts with count $\leq 2$ |
|-------------------------|-------|----------------|----------------|--------------------|-------------------|------------------|-----------------|-----------------------|--------------------------------------|
| Cap                     | 17    | 61             | 50 770 695     | 5 820 120          | 3 585 755         | 75               | 584             | 290                   | 79                                   |
| Upper stalk             | 17    | 29             | 82 587 170     | 11 714 864         | 7 206 886         | 73               | 660             | 257                   | 68                                   |
| Lower stalk             | 17    | 14             | 2 092          | 260                | 166               | 74               | 0               | 0                     | -                                    |
| Rhizoid                 | 17    | 36             | 38 755 094     | 18 101 837         | 11 382 777        | 75               | 475             | 167                   | 51                                   |
| Cap                     | 19    | 95             | 25 526 511     | 19 934 510         | 12 521 349        | 76               | 8 010 785       | 62 257                | 44                                   |
| Upper stalk             | 19    | 22             | 14 007 423     | 10 572 421         | 6 395 304         | 73               | 2 285 994       | 45 187                | 42                                   |
| Lower stalk             | 19    | 11             | 18 869 617     | 14 309 848         | 8 742 817         | 74               | 656 729         | 30 620                | 43                                   |
| Rhizoid                 | 19    | 11             | 24 207 912     | 18 101 837         | 11 021 291        | 74               | 1 156 418       | 38 275                | 45                                   |
| Cap                     | 25    | 40             | 22 444 960     | 19 460 102         | 11 548 241        | 72               | 3 325 240       | 58 967                | 45                                   |
| Upper stalk             | 25    | 30             | 31 098 736     | 26 710 669         | 15 574 348        | 73               | 4 547 527       | 57 122                | 43                                   |
| Lower stalk             | 25    | 23             | 37 346 096     | 32 191 425         | 19 013 248        | 73               | 4 334 098       | 62 677                | 44                                   |
| Rhizoid                 | 25    | 18             | 37 858 071     | 32 519 937         | 19 919 778        | 73               | 3 466 028       | 58 615                | 48                                   |
| Cap                     | 26    | 132            | 32 643 222     | 28 358 416         | 16 777 807        | 72               | 4 656 581       | 63 592                | 44                                   |
| Upper stalk             | 26    | 16             | 22 694 589     | 19 609 743         | 11 646 681        | 72               | 3 291 813       | 50 613                | 42                                   |
| Lower stalk             | 26    | 51             | 37 555 049     | 32 280 766         | 19 117 797        | 73               | 1 307 014       | 39 224                | 43                                   |
| Rhizoid                 | 26    | 16             | 27 307 714     | 16 273 913         | 9 951 940         | 72               | 293 461         | 23183                 | 39                                   |
| Cap                     | 27    | 187            | 27 859 229     | 21 702 199         | 13 055 825        | 72               | 6 704 550       | 77 998                | 45                                   |
| Upper stalk             | 27    | 155            | 30 596 065     | 23 362 341         | 14 172 132        | 73               | 4 437 570       | 59 649                | 42                                   |
| Lower stalk             | 27    | 63             | 25 217 910     | 19 013 147         | 11 575 387        | 73               | 2 137 899       | 45 753                | 43                                   |
| Rhizoid                 | 27    | 63             | 29 781 682     | 15 189 655         | 9 203 797         | 73               | 480 492         | 33 149                | 46                                   |
| Cap                     | 45    | 713            | 30 795 845     | 26 732 918         | 16 179 143        | 73               | 7 615 615       | 71 764                | 45                                   |
| Upper stalk             | 45    | 72             | 28 618 780     | 24 538 566         | 14 672 568        | 74               | 2 949 290       | 55 172                | 47                                   |
| Lower stalk             | 45    | 15             | 29 851 320     | 25 462 402         | 15 279 659        | 73               | 1 186 788       | 36 048                | 43                                   |
| Rhizoid                 | 45    | 49             | 43 496 924     | 36 991 784         | 22 472 939        | 73               | 2 078 673       | 44 095                | 44                                   |
| Cap                     | 46    | 534            | 43 691 338     | 37 748 810         | 22 697 840        | 72               | 10 250 494      | 79 349                | 44                                   |
| Upper stalk             | 46    | 211            | 26 586 549     | 22 842 662         | 13 930 603        | 73               | 4 370 405       | 61 734                | 45                                   |
| Lower stalk             | 46    | 144            | 29 167 985     | 25 131 292         | 15 639 747        | 73               | 6 189 014       | 64 045                | 46                                   |
| Rhizoid                 | 46    | 122            | 28 000 697     | 24 124 084         | 14 737 583        | 72               | 5 492 434       | 75 135                | 48                                   |

374  
 375  
 376  
 377  
 378  
 379  
 380  
 381  
 382  
 383

384  
385  
386  
387  
388  
389

**Table 2. BUSCO analysis of the *de novo* assembled transcriptome of *A. acetabulum*.** BUSCOs refer to the genes present in the different databases of the BUSCO software. Two datasets were used in our analysis, one containing 2168 genes conserved across Chlorophyta, and one containing 303 genes conserved across eukaryotes.

|                              | Eukaryote BUSCO hits | Chlorophyta BUSCO hits |
|------------------------------|----------------------|------------------------|
| <b>Complete BUSCOs</b>       | 245 (80.9%)          | 1349 (62.2%)           |
| <b>Single-copy</b>           | 159 (52.5%)          | 1047 (48.3%)           |
| <b>Duplicated</b>            | 86 (28.4%)           | 302 (13.9%)            |
| <b>Fragmented BUSCOs</b>     | 45 (14.9%)           | 177 (8.2%)             |
| <b>Missing BUSCOs</b>        | 13 (4.2%)            | 642 (29.6%)            |
| <b>Total BUSCOs searched</b> | 303                  | 2168                   |

390  
391  
392  
393  
394  
395  
396  
397

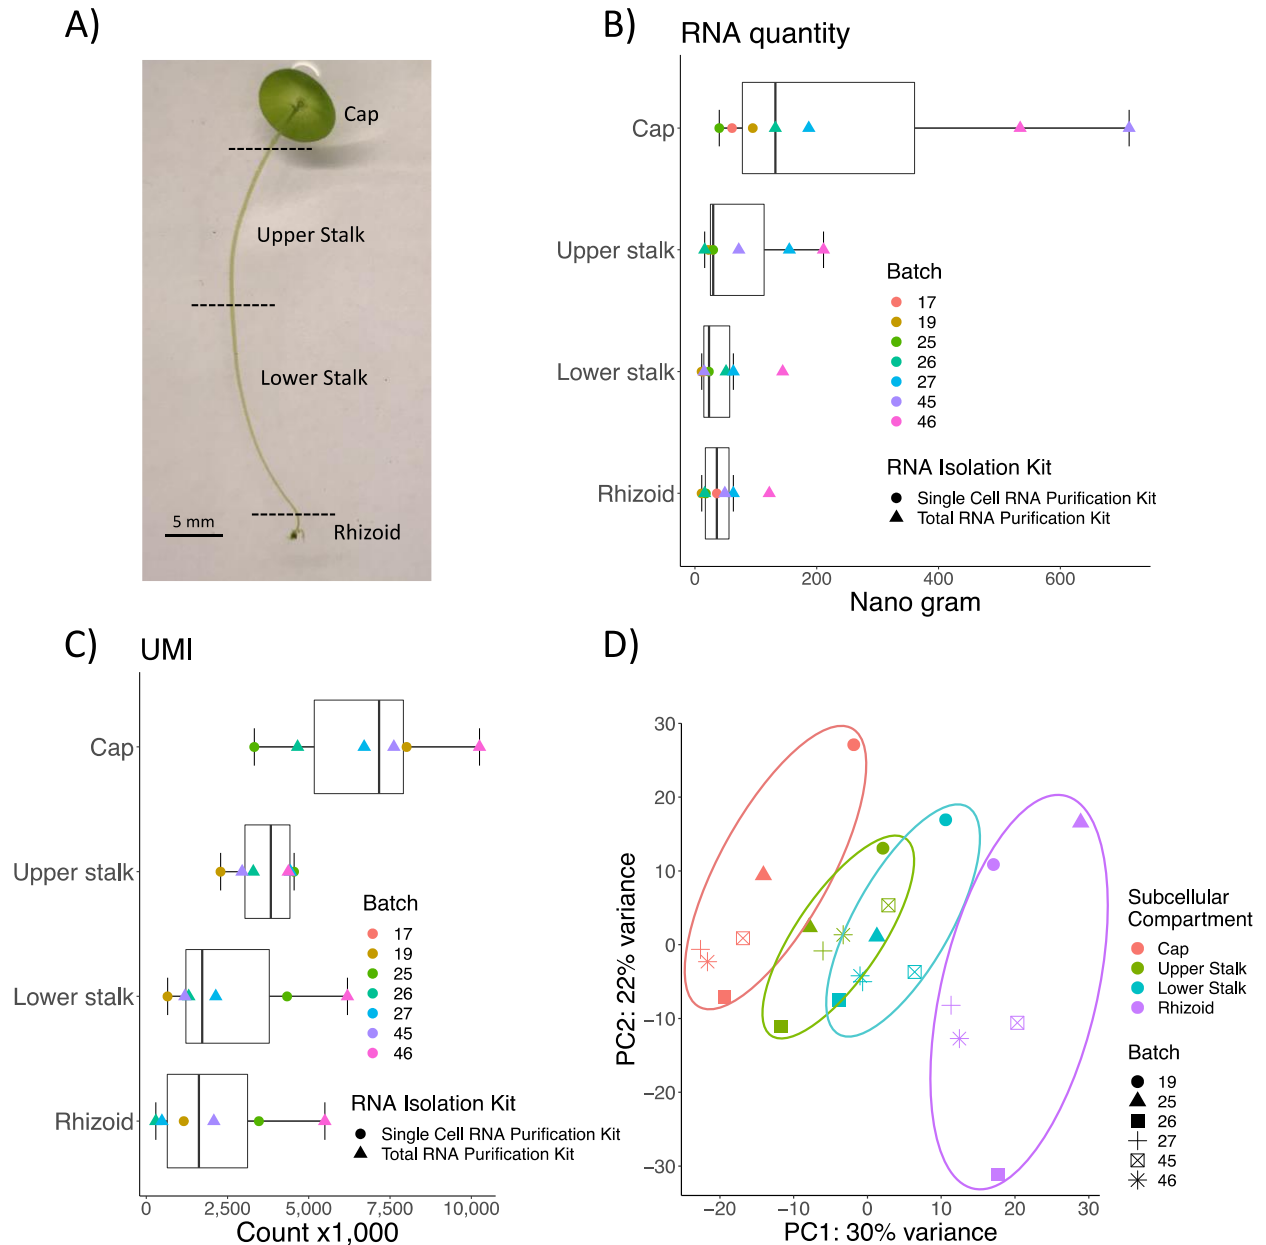

398  
399  
400  
401  
402  
403  
404  
405  
406  
407  
408  
409  
410  
411  
412  
413  
414

**Figure 1. RNA isolation and sequencing of subcellular compartments of adult *A. acetabulum*.** A) Image of an adult cell of *A. acetabulum*. The dashed lines indicate approximate incision sites for separating the different subcellular sections; cap, upper stalk, lower stalk and rhizoid. B) Boxplot showing the total RNA quantity isolated from the different subcellular compartments. The dots represent the individual samples colored according to which batch the sample originate from, and shaped according to which RNA isolation kit that was used. C) Boxplot showing the summarized gene expression levels (total UMI counts) of the different samples. The dots are the same as above. D) Principal Component Analysis (PCA) of the sample variation based on variance stabilized counts (see Methods). The four subcellular compartments are shown in color, and the different batches which the samples originate from (described in the Methods) are indicated as shapes.



## 415 Differential transcript distribution

416 The majority of the assembled transcripts were expressed at low levels (which is expected as  
417 transcriptomes assembled *de novo* from NGS data always contains a high number of assembly  
418 artefacts and wrongly assembled isoforms). 87% of the transcripts had a mean expression of >1  
419 TMM across the samples, and filtering nuclear encoded transcripts with a raw count of one or  
420 more in at least four samples retained 82,164 transcripts. Out of these, 13,057 transcripts were  
421 identified as significantly differentially distributed between at least two subcellular  
422 compartments. Of the differentially distributed transcripts, 4,197 transcripts were uniquely  
423 located in the rhizoid, 2,710 transcripts were unique to the cap, and 255 and 259 transcripts  
424 were uniquely located in the upper- and lower stalk respectively (Figure 2A). 1,617 transcripts  
425 were enriched in both the cap and the upper stalk, 163 transcripts in both the upper- and lower  
426 stalk, and 1,234 transcripts were enriched in both the lower stalk and the rhizoid. Visualizing  
427 the expression of these differentially distributed transcripts (Figure 2B) confirms the clustering  
428 analysis in that there are two large and distinct pools of enriched transcripts in the cap and the  
429 rhizoid, and that these subcellular compartments are the least similar in terms of gene content.  
430 The upper- and lower stalk samples have similar expression profiles and share a large number  
431 of differentially distributed transcripts. These two compartments also have an overall lower  
432 gene expression compared to the cap and rhizoid.

433

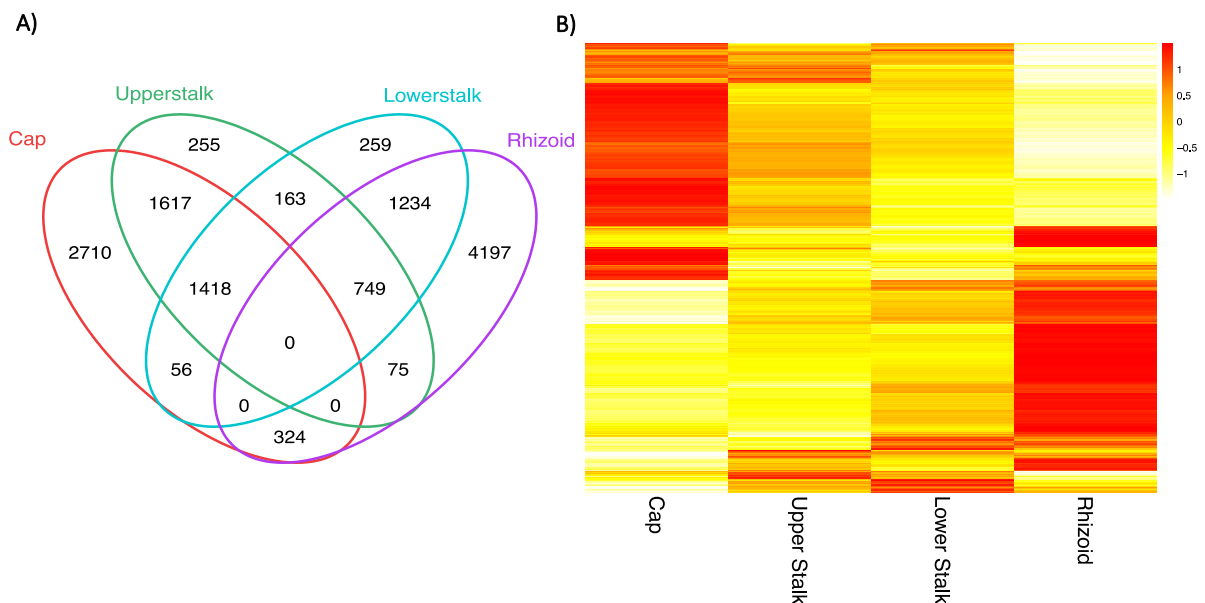

434  
435 **Figure 2. Differentially distributed transcripts between the subcellular compartments.** A) Venn  
436 diagram showing the shared and unique number of transcripts that are differentially distributed between  
437 the subcellular compartments. B) Heatmap of the differentially distributed transcripts. Colors represent  
438 scaled TMM (Trimmed Mean of M-values) expression values. The mean TMM values across the  
439 different samples from each subcellular structure is shown.

## 440 **GO enrichment**

441 In order to investigate which genetic processes were taking place in the different subcellular  
442 compartments, we analyzed the different subcellular pools of nuclear encoded transcripts for  
443 the presence of enriched functional categories. As the two stalk samples displayed very similar  
444 expression patterns, they were analyzed together (referred to as “stalk”) to get a clearer picture  
445 of the differences between the stalk, cap and the rhizoid. The GO-enrichment analysis resulted  
446 in 126 enriched GO-terms in the cap, 134 in the rhizoid, and 57 in the stalk (there were eight  
447 enriched GO-terms in the upper stalk and 14 in the lower stalk when analyzed separately) (Table  
448 S7).

449  
450 Nuclear encoded mRNA transcripts accumulating in the cap were enriched for GO-terms  
451 related to photosynthesis such as photosynthetic processes, chloroplast components and  
452 thylakoid (Figure 3). General metabolic processes, organization of the plasma membrane and  
453 extracellular matrix, development and transport were also enriched in the cap, and to a lesser  
454 extent enriched in the rhizoid. No particular processes seemed to be unique to the stalk.  
455 However, the GO-term “cytoplasmic chromosome”, which was also enriched in the cap, was  
456 significantly enriched in the stalk, and GO-terms related to metabolic processes, catalytic  
457 activity, cellular organelles and transport was to small degree enriched in the stalk. Nuclear  
458 encoded mRNA transcripts accumulating in the rhizoid were enriched for GO-terms related to  
459 the nucleus, replication, transcription, and cell motility. In addition, cytoskeleton organization  
460 and cell- division and differentiation were enriched in the rhizoid and also to a lesser extent in  
461 the cap. Other processes which seemed to be more widely distributed and which were enriched  
462 in both the cap and the rhizoid were related to, transport, translation, ribosome organization,  
463 cell wall- and cell membrane organization, development and morphogenesis, and general  
464 metabolic and enzymatic processes.

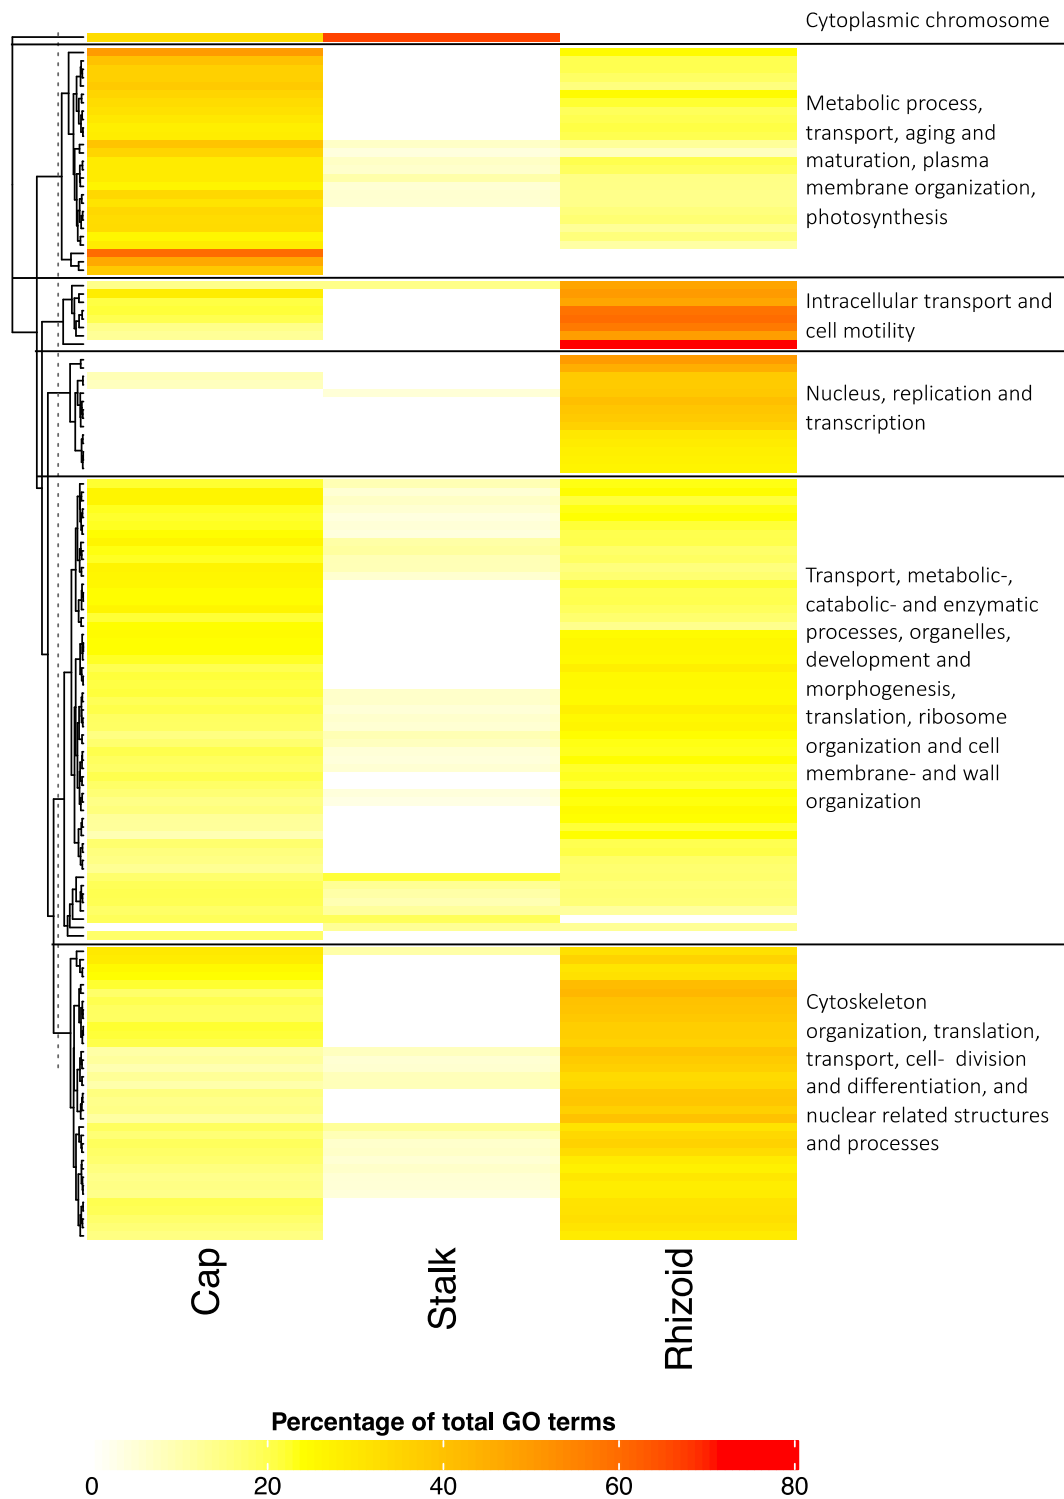

465

466

467

468

469

470

471

472

473

474

**Figure 3. GO-enrichment analysis of transcripts differentially distributed between subcellular compartments.** Heatmap of the enriched GO-terms among the differentially distributed transcripts in each subcellular compartment (note that the stalk samples are analyzed together). The colors indicate the percentage of differentially distributed transcripts annotated with a given GO-category compared to the total number of transcripts in the same GO-category. All GO-categories (Biological Process, Cellular Compartment and Molecular Function) are shown together. A GO-term not significantly enriched in a subcellular compartment is set to zero percent (hence shown in white color). The most prevalent GO-terms have been simplified and highlighted on the right side of the heatmap. See table S7 for a full description of the GO-enrichment results.

475

## 476 **Distribution of genes involved in mRNA compartmentalization**

477 Analyses of the mRNA distribution indicated the presence of functionally related subcellular  
478 pools of transcripts. Therefore, we investigated in detail the distribution patterns of transcripts  
479 potentially involved in generating this type of distribution.

480

481 Transcripts related to the cytoskeleton, such as actin and tubulin, are highly abundant along the  
482 entire cell, and apparently not specifically associated with any particular subcellular region  
483 (Figure 4A and B). Transcripts encoding motor proteins moving along the cytoskeleton such as  
484 myosin, dynein and kinesin, are also present throughout the cell, although not as evenly  
485 distributed as the cytoskeletal components (Figure 4C-E). Myosin transcripts were more  
486 abundant in the apical end and decreasing towards the rhizoid. This includes class XIII myosin  
487 which have been shown to be involved in organelle transport and tip growth in *A. cliftonii* and  
488 enriched in the apical regions of the cell (Vugrek et al., 2003). The same trend was observed  
489 also for kinesins, except for two transcripts which were most abundant in the rhizoid.  
490 Interestingly, these two transcripts have the closest blast hits against kinesin 13 and 14, which  
491 are known to move in both directions on the microtubule, and can thereby travel in the opposite  
492 direction on the microtubules than the other kinesins.

493

494 In contrast, the dyneins were overall lesser expressed than myosins and kinesins. The most  
495 highly abundant dynein was present through the cell in roughly equal amounts, while the rest  
496 of the transcripts were most abundant in the rhizoid. Myosins and kinesin generally move  
497 towards the plus-ends of the polarized actin microfilaments and microtubules respectively, and  
498 thus from the nucleus towards the cell membrane. While dyneins move toward the minus end  
499 of microtubules towards the cell interior (Alberts et al., 2002). Hence, motor proteins moving  
500 towards the cell membrane are of a slightly higher abundance in the apical part of the cell  
501 (except from two kinesin transcripts which are of a higher abundance in the basal part of the  
502 cell), while motor proteins moving towards the cellular interior are seemingly of a higher  
503 abundance in the basal part of the cell (lower stalk and rhizoid).

504

505 Vesicular transport is a fundamental mechanism for intracellular transport of cargo  
506 in eukaryote cells, and has been associated with intracellular transport of RNA (Basyuk et al.,  
507 2003; Roberts et al., 2013; Skog et al., 2008). Vesicle formation relies on coat proteins, and  
508 COPI- COPII- and Clathrin coated vesicles are the main type of vesicles in eukaryote cells.

509 COPI-coated vesicles move from ER to golgi, COPII-coated vesicles move between parts of  
 510 golgi and retrograde transport from golgi to ER, and Clathrin-coated vesicles move from golgi  
 511 to the plasma membrane (Gomez-Navarro et al., 2016). In our results, two of three COPI  
 512 transcripts were most abundant in the cap and decrease towards the rhizoid, while one COPII  
 513 transcript was most abundant in the rhizoid (Figure 4F). Two Clathrin homologs were  
 514 distributed throughout the cell, one of these transcripts was of noticeable higher abundance than  
 515 the other (Figure 4G). This high abundant transcript was also of a slightly higher concentration  
 516 in the cap and decreasing towards the rhizoid.

517

518 Three copies of poly(A) polymerases were expressed in *A. acetabulum*. All three were evenly  
 519 distributed throughout the cell, however one was higher expressed than the others (Figure 4H).

520

521

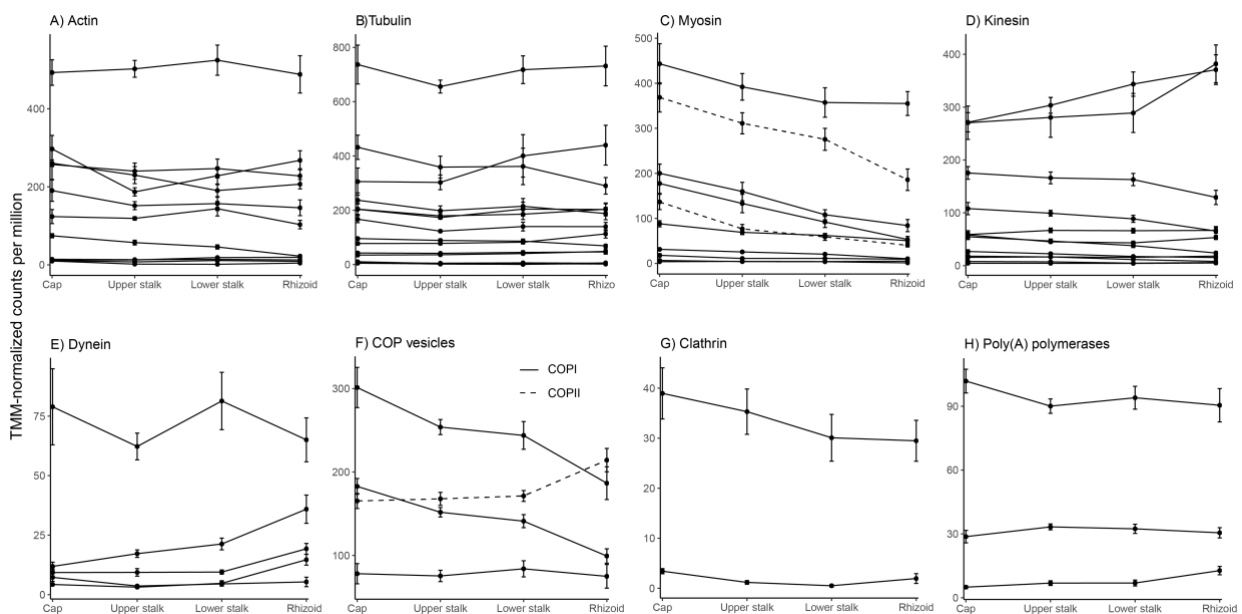

522

523 **Figure 4. Distribution of transcripts related to transport and RNA localization.** The distribution of  
 524 homologs of Actin (A), Tubulin (B), Myosin (C) – the dashed lines indicates homologs of Class XIII  
 525 myosin identified in *A. cliftonii*, Kinesin (D), Dynein (E), genes creating COP vesicles (F), Clathrin (G)  
 526 and poly(A) polymerases (H). Expression values (TMM-normalized counts per million) are shown on  
 527 the y-axis, with error bars representing standard error. Only transcripts with a mean normalized  
 528 expression >1 across all samples are shown.

529

### 530 **Comparative transcriptomics between *A. acetabulum* and *Caulerpa taxifolia***

531 Orthology searches between the transcriptomes of *A. acetabulum* and *Caulerpa taxifolia*  
 532 resulted in 4,483 orthogroups represented by at least one transcript from each species. Of these  
 533 orthogroups, 2,120 were single-copy orthologues with a single representative from each

534 species. Comparison of the different samples from the two species based on expression  
535 dynamics of these single-copy orthologues showed that the genes clustered strongly according  
536 to species, rather than to subcellular compartment between species (Figure 5).  
537

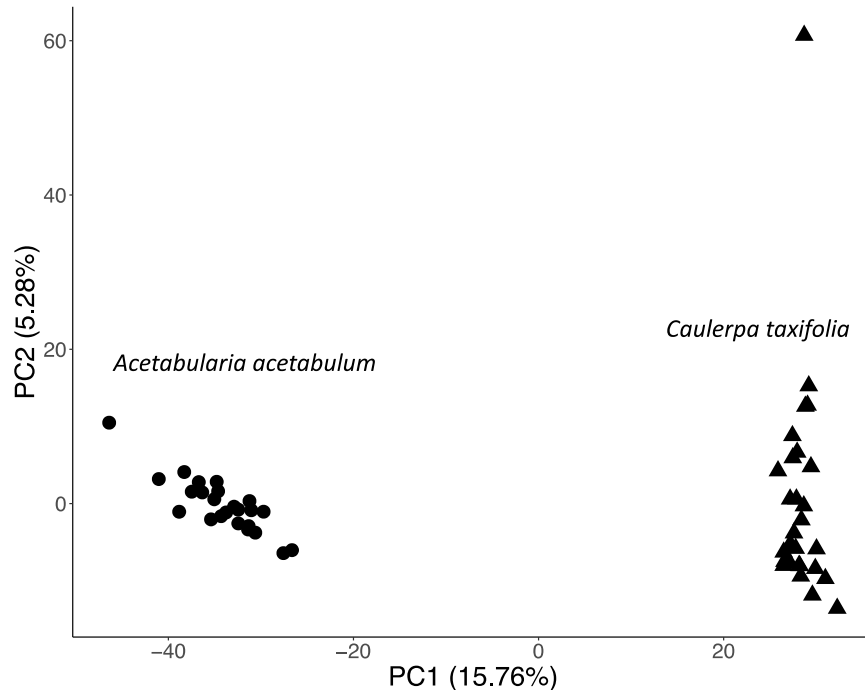

538  
539 **Figure 5. Comparison of the expression profile of gene orthologues between *A. acetabulum* and *C.***  
540 ***taxifolia*.** Principal Component Analysis (PCA) of the sample variation based on TMM-normalized  
541 counts per million (see Methods) of single-copy orthologues between *A. acetabulum* (circles) and *C.*  
542 *taxifolia* (triangles).  
543

544

## 545 Discussion

### 546 Apical-basal mRNA gradient in *A. acetabulum*

547 *Acetabularia acetabulum* has been used as a model system for cell morphogenesis for decades,  
548 and it has been suspected that differential distribution of RNA long the cell axis is an underlying  
549 mechanism for its sophisticated morphology (Dumais et al., 2000; Hämmerling, 1934b;  
550 Serikawa et al., 2001; Vogel et al., 2002). To investigate the distribution of mRNA in adult *A.*  
551 *acetabulum* cells we have performed subcellular mRNA sequencing and functional enrichment  
552 analysis. We have tagged each mRNA molecule with unique molecular indexes (UMIs) which  
553 allows for true quantification of mRNA by eliminating the effect of amplification bias  
554 introduced during library preparation. Despite isolating RNA from subsections of a single-cell,  
555 we were able to capture the majority of expressed transcripts, and although there is some



556 variation between samples the procedure was repeatable and robust even to the type of RNA  
557 isolation protocols.

558  
559 Our results demonstrate the presence of RNA throughout the entire cell length, and identified  
560 the highest amount of mRNA at the apical end of the cell (the cap) decreasing towards the basal  
561 end (the rhizoid), confirming earlier discoveries of an apical-basal gradient of RNA in *A.*  
562 *acetabulum* (Baltus et al., 1968; Hämmerling, 1936; Werz, 1955). However, while it has been  
563 believed that this gradient is due to different concentrations of RNA encoded by the  
564 chloroplasts, and not nuclear encoded RNAs (Naumova et al., 1976), we rather find that the  
565 apical-basal gradient is mainly caused by nuclear encoded mRNAs.

566  
567 **Localized pools of transcripts support subcellular mRNA compartmentalization**

568 A long-standing question has been whether the observed gradient of mRNA in *A. acetabulum*  
569 is homogeneous in transcript composition, or whether there are distinct pools of transcripts  
570 along the cell. Hämmerling's grafting experiments suggested the existence of local  
571 determinants of morphogenesis, and Dumais et al. (2000) speculated that mRNAs would either  
572 be distributed throughout the cell, or localized to the apical or basal ends. Our results show that  
573 while some gene transcripts are distributed evenly across the entire cell, a large part are actually  
574 abundantly located to different subcellular compartments. We also found that these pools of  
575 transcripts are composed of functionally related transcripts. Transcripts related to  
576 photosynthesis are co-localized and accumulated in the apical end of the cell, while transcripts  
577 related to nuclear processes co-localized in the basal end. This pattern shows that the RNA  
578 gradient is not a homogeneous mix of gene transcripts, which confirms that mechanisms to  
579 ensure specific and functional RNA localization must be in place in *A. acetabulum*.

580  
581 There were overall fewer transcripts localized in the stalk. This was not surprising as the stalk  
582 is mainly filled with a central vacuole, with only a thin layer of cytoplasm covering it (Dumais  
583 et al., 2000), leaving very little room for other subcellular structures or pools of transcripts. We  
584 therefore assume that there are very few processes happening exclusively in the stalk and that  
585 the stalk might even function as a physical border between the cap and the rhizoid, making sure  
586 that molecules and other substances are not mixed between the two compartments, but instead  
587 carefully transported between them.

588  
589

590 **Active mRNA transport is likely the main mechanism for establishment of cell polarity**

591 RNA can be distributed around a cell either by passive diffusion from the nucleus, or by active  
592 transport along the cytoskeleton (St Johnston, 2005). Studies tracking the movement of  
593 radioactive labelled RNA labelled have shown that mRNA travel faster in *A. acetabulum* than  
594 what is possible by diffusion alone (Kloppstech et al., 1975b), and simply the size of the cell,  
595 with the nucleus and the cap separated by several centimeters, puts obvious demands on active  
596 intracellular transport. A highly sophisticated and extensively developed cytoskeleton has been  
597 overserved in *A. acetabulum*, with large tracks of actin filaments running the entire length of  
598 the cell (Menzel, 1994). Experiments by Mine et al. (2001) showed that inhibiting actin  
599 polymerization with cyclohalasin D disrupts the established mRNA gradients, indicating that  
600 there is an association between mRNA and the cytoskeleton. As expected, we find that  
601 transcripts encoding the main cytoskeletal components such as actin and tubulin are uniformly  
602 distributed throughout the cell. Furthermore, we see that both Clathrin and COP genes, as well  
603 as homologs of motor proteins traveling in both directions on the cytoskeleton, are distributed  
604 throughout the cell, suggesting that these types of vesicular transport systems are active in the  
605 entire cell.

606

607 **mRNA stabilization and post-transcriptional control**

608 The fact that some transcripts are evenly distributed while others are localized, implies that the  
609 cell is either able to distinguish between which mRNAs should be transported where, but can  
610 also mean that there are mechanisms for selective stabilization and degradation of mRNAs at  
611 different locations in the cell. While actin microfilaments are present throughout the cell for the  
612 entire life cycle of *A. acetabulum*, microtubules do not appear until the final stages of  
613 development where they serve as transport tracks in the cap (Menzel, 1986; Menzel, 1994).  
614 This is interesting as tubulin genes are expressed much earlier and distributed throughout the  
615 cell, so tubulin mRNAs must be stabilized and stored in the cytoplasm and prevented from  
616 being translated. That mRNA is long-lived in *A. acetabulum* cells is supported by experiments  
617 showing that development and morphogenesis can continue for days, and even weeks, after  
618 amputation of the nucleus (Stich et al., 1958; Yasinovski et al., 1979), and that radioactive  
619 RNAs exist in *A. acetabulum* cells long after treatment with radioactive labelled UTP  
620 (Kloppstech et al., 1982; Schweiger, 1977). It is also interesting that we find polyadenylation  
621 genes distributed throughout the cell, as editing, shortening and elongation of the poly-A-tail is  
622 an important mechanism for translational control (Aphasizhev, 2005; Wickens, 1992).

623

624 **The cap is the main morphogenetic and metabolic structure**

625 The GO-enrichment analysis also shows a higher level of catalytic- and metabolic activity in  
626 the cap compared the rhizoid, indicating the cap is the metabolically more diverse and active  
627 region of the cell. We also see the greatest diversity of expressed transcripts in the cap, and the  
628 highest overall RNA content. These finding agree with earlier observations that the cap is the  
629 section of the cell with the highest morphogenetic capacity, or developmental potential, as it  
630 can regenerate both whorls of hair and the entire cap structure after being dissected from the  
631 rhizoid (Menzel, 1994; Serikawa et al., 2001), while the nucleus is mostly the place for  
632 production of mRNAs and replication.

633

634 **Ortholog comparison indicates little genetic homology between subcellular sections of *A.***  
635 ***acetabulum* and *Caulerpa taxifolia***

636 *Caulerpa taxifolia* is another Chlorophyte algae with many similarities to *A. acetabulum*, most  
637 notably they are both gigantic single-celled species with highly complex cellular morphologies  
638 with clearly distinguished apical and basal ends. However, unlike *A. acetabulum*, *C. taxifolia*  
639 is a syncytium with hundreds, or even thousands, of nuclei scattered throughout the cell. Ranjan  
640 et al. (2015) characterized the gene expression patterns of the different subcellular sections of  
641 *C. taxifolia* and found that they contained unique expression profiles, similar to what we see in  
642 *A. acetabulum*. However, comparing the expression profile of single-copy orthologs between  
643 the two species shows that the subcellular sections are more similar within each species rather  
644 than between species, indicating that there are different genes active in the apical and basal  
645 sections in these two species, and hence little homology at the genetic level. Nevertheless,  
646 comparing the functional annotations of these genes indeed shows some similarities. Both  
647 species are enriched for nuclear components and DNA-related processes, such as DNA  
648 replication and transcription in the basal parts of the algae, as well as displaying a higher  
649 catalytic activity in the apical parts (Ranjan et al., 2015). Therefore, although morphologically  
650 similar cell sections of these two species contain largely non-orthologous mRNAs, they do  
651 seem to share overall similar genetic functions. This might be an indication of evolutionary  
652 convergence on a functional level in the two species.

653

654

655

656

## 657 **References**

- 658 Alberts, B., Johnson, A., Lewis, J., Martin, R., Roberts, K., & Walter, P. (2002). *Molecular*  
659 *Biology of the Cell* (4 ed.). New York: Garland Science.
- 660 Aphasizhev, R. (2005). RNA uridylyltransferases. *Cell Mol Life Sci*, 62(19-20), 2194-2203.  
661 doi:10.1007/s00018-005-5198-9
- 662 Arimoto, A., Nishitsuji, K., Higa, Y., Arakaki, N., Hisata, K., Shinzato, C., . . . Shoguchi, E.  
663 (2019). A siphonous macroalgal genome suggests convergent functions of homeobox  
664 genes in algae and land plants. *DNA Res*, 26(2), 183-192. doi:10.1093/dnares/dsz002
- 665 Bacher, R., Chu, L. F., Leng, N., Gasch, A. P., Thomson, J. A., Stewart, R. M., . . . Kendzioriski, C.  
666 (2017). SCnorm: robust normalization of single-cell RNA-seq data. *Nature Methods*,  
667 14(6), 584+. doi:DOI 10.1038/nmeth.4263
- 668 Backman, T. W. H., & Girke, T. (2016). systemPipeR: NGS workflow and report generation  
669 environment. *BMC Bioinformatics*, 17, 388. doi:10.1186/s12859-016-1241-0
- 670 Baltus, E., Edstrom, J. E., Janowski, M., Hanocquq, J., Tencer, R., & Brachet, J. (1968). Base  
671 Composition and Metabolism of Various Rna Fractions in Acetabularia Mediterranea.  
672 *Proc Natl Acad Sci U S A*, 59(2), 406+. doi:DOI 10.1073/pnas.59.2.406
- 673 Basyuk, E., Galli, T., Mougél, M., Blanchard, J. M., Sitbon, M., & Bertrand, E. (2003).  
674 Retroviral genomic RNAs are transported to the plasma membrane by endosomal  
675 vesicles. *Developmental Cell*, 5(1), 161-174. doi:Doi 10.1016/S1534-5807(03)00188-6
- 676 Berger, S. (1990). Dasycladaceae - a family of giant unicellular algae ideal for research.  
677 *Experimental Embryology in Aquatic Plants and Animals*, 195, 3-19. doi:10.1007/978-  
678 1-4615-3830-1\_1
- 679 Berger, S. (2006). *Photo-Atlas og living Dasycladales: Carnets de Geologie*.
- 680 Bolger, A. M., Lohse, M., & Usadel, B. (2014). Trimmomatic: a flexible trimmer for Illumina  
681 sequence data. *Bioinformatics*, 30(15), 2114-2120.  
682 doi:10.1093/bioinformatics/btu170
- 683 Bushnell, B. (2015). *BBMap short-read aligner, and other bioinformatics tools*.
- 684 Dumais, J., Serikawa, K., & Mandoli, D. F. (2000). Acetabularia: A Unicellular Model  
685 for Understanding Subcellular Localization and Morphogenesis during Development.  
686 *Journal of Plant Growth Regulation*, 19(3), 253-264. doi:10.1007/s003440000035
- 687 Emms, D. M., & Kelly, S. (2015). OrthoFinder: solving fundamental biases in whole genome  
688 comparisons dramatically improves orthogroup inference accuracy. *Genome Biology*,  
689 16. doi:ARTN 157  
690 10.1186/s13059-015-0721-2
- 691 Garcia, E., & Dazy, A. C. (1986). Spatial-Distribution of Poly(a)+ Rna and Protein-Synthesis in  
692 the Stalk of Acetabularia-Mediterranea. *Biology of the Cell*, 58(1), 23-29. Retrieved  
693 from <Go to ISI>://WOS:A1986F879300003
- 694 Gomez-Navarro, N., & Miller, E. A. (2016). COP-coated vesicles. *Current Biology*, 26(2), R54-  
695 R57. doi:10.1016/j.cub.2015.12.017
- 696 Grabherr, M. G., Haas, B. J., Yassour, M., Levin, J. Z., Thompson, D. A., Amit, I., . . . Regev, A.  
697 (2011). Full-length transcriptome assembly from RNA-Seq data without a reference  
698 genome. *Nature Biotechnology*, 29(7), 644-U130. doi:10.1038/nbt.1883
- 699 Gu, Z. G., Eils, R., & Schlesner, M. (2016). Complex heatmaps reveal patterns and  
700 correlations in multidimensional genomic data. *Bioinformatics*, 32(18), 2847-2849.  
701 doi:10.1093/bioinformatics/btw313

- 702 Huerta-Cepas, J., Forslund, K., Coelho, L. P., Szklarczyk, D., Jensen, L. J., von Mering, C., &  
703 Bork, P. (2017). Fast Genome-Wide Functional Annotation through Orthology  
704 Assignment by eggNOG-Mapper. *Molecular Biology and Evolution*, *34*(8), 2115-2122.  
705 doi:10.1093/molbev/msx148
- 706 Huerta-Cepas, J., Szklarczyk, D., Heller, D., Hernandez-Plaza, A., Forslund, S. K., Cook, H., . . .  
707 Bork, P. (2019). eggNOG 5.0: a hierarchical, functionally and phylogenetically  
708 annotated orthology resource based on 5090 organisms and 2502 viruses. *Nucleic  
709 Acids Research*, *47*(D1), D309-D314. doi:10.1093/nar/gky1085
- 710 Hämmerling, J. (1934a). On genome effects and formation ability in Acetabularia. *Wilhelm  
711 Roux Archiv Fur Entwicklungsmechanik Der Organismen*, *132*(2/3), 424-462.  
712 Retrieved from <Go to ISI>://WOS:000200165400004
- 713 Hämmerling, J. (1934b). On substances determining the development in Acetabularia  
714 mediterranea, their spatial and temporal distribution and origin. *Wilhelm Roux Archiv  
715 Fur Entwicklungsmechanik Der Organismen*, *131*(1), 1-81. Retrieved from <Go to  
716 ISI>://WOS:000200164900001
- 717 Hämmerling, J. (1934c). Physiological development and genetic foundation of the form  
718 creation in the shielding algae Acetabularia. *Naturwissenschaften*, *32*, 829-836.  
719 Retrieved from <Go to ISI>://WOS:000200261600132
- 720 Hämmerling, J. (1936). Studien zum Polaritätsproblem. *Zoologische Jahrbücher*, *56*, 441-483.
- 721 Hämmerling, J. (1953). Nucleo-cytoplasmic Relationships in the Development of  
722 Acetabularia. In G. H. Bourne & J. F. Danielli (Eds.), *International Review of Cytology*  
723 (Vol. 2, pp. 475-498): Academic Press.
- 724 Hämmerling, J. (1963). *Nucleo-Cytoplasmic Interactions in Acetabularia and other Cells* (Vol.  
725 14): Annu. Rev. Plant Physiol.
- 726 Haas, B. J., Papanicolaou, A., Yassour, M., Grabherr, M., Blood, P. D., Bowden, J., . . . Regev,  
727 A. (2013). De novo transcript sequence reconstruction from RNA-seq using the Trinity  
728 platform for reference generation and analysis. *Nat Protoc*, *8*(8), 1494-1512.  
729 doi:10.1038/nprot.2013.084
- 730 Jukes, T. H. (1996). Neutral changes and modifications of the genetic code. *Theoretical  
731 Population Biology*, *49*(2), 143-145. doi:DOI 10.1006/tpbi.1996.0008
- 732 Kaplan, D. R. (1992). The Relationship of Cells to Organisms in Plants - Problem and  
733 Implications of an Organismal Perspective. *International Journal of Plant Sciences*,  
734 *153*(3), S28-S37. doi:Doi 10.1086/297061
- 735 Kaplan, D. R., & Hagemann, W. (1991). The Relationship of Cell and Organism in Vascular  
736 Plants - Are Cells the Building-Blocks of Plant Form. *Bioscience*, *41*(10), 693-703.  
737 doi:Doi 10.2307/1311764
- 738 Klopstech, K. (1977). Messenger-Type Rna from Acetabularia. *Protoplasma*, *91*(2), 224-224.  
739 Retrieved from <Go to ISI>://WOS:A1977DB40900018
- 740 Klopstech, K., & Schweiger, H. G. (1975a). 80 S ribosomes in Acetabularia major.  
741 Distribution and transportation within the cell. *Protoplasma*, *83*(1-2), 27-40.  
742 Retrieved from <https://www.ncbi.nlm.nih.gov/pubmed/1118628>
- 743 Klopstech, K., & Schweiger, H. G. (1975b). Polyadenylated Rna from Acetabularia.  
744 *Differentiation*, *4*(3), 115-123. doi:DOI 10.1111/j.1432-0436.1975.tb01450.x
- 745 Klopstech, K., & Schweiger, H. G. (1982). Stability of poly(A)(+)RNA in nucleate and  
746 anucleate cells of Acetabularia. *Plant Cell Rep*, *1*(4), 165-167.  
747 doi:10.1007/BF00269189



- 748 Langmead, B., & Salzberg, S. L. (2012). Fast gapped-read alignment with Bowtie 2. *Nat*  
749 *Methods*, 9(4), 357-359. doi:10.1038/nmeth.1923
- 750 Love, M. I., Huber, W., & Anders, S. (2014). Moderated estimation of fold change and  
751 dispersion for RNA-seq data with DESeq2. *Genome Biology*, 15(12), 550.  
752 doi:10.1186/s13059-014-0550-8
- 753 McCarthy, D. J., Chen, Y. S., & Smyth, G. K. (2012). Differential expression analysis of  
754 multifactor RNA-Seq experiments with respect to biological variation. *Nucleic Acids*  
755 *Research*, 40(10), 4288-4297. doi:10.1093/nar/gks042
- 756 Menzel, D. (1986). Visualization of Cytoskeletal Changes through the Life-Cycle in  
757 *Acetabularia*. *Protoplasma*, 134(1), 30-42. doi:Doi 10.1007/Bf01276373
- 758 Menzel, D. (1994). Cell differentiation and the cytoskeleton in *Acetabularia*. *New Phytologist*,  
759 128(3), 369-393. doi:10.1111/j.1469-8137.1994.tb02984.x
- 760 Mine, I., Okuda, K., & Menzel, D. (2001). Poly(A)(+) RNA during vegetative development of  
761 *Acetabularia peniculus*. *Protoplasma*, 216(1-2), 56-65. doi:Doi 10.1007/Bf02680131
- 762 Naumova, L. P., Pressman, E. K., & Sandakchiev, L. S. (1976). Gradient of Rna Distribution in  
763 Cytoplasm of *Acetabularia-Mediterranea*. *Plant Science Letters*, 6(4), 231-235. doi:Doi  
764 10.1016/0304-4211(76)90052-3
- 765 Niklas, K. J., Cobb, E. D., & Crawford, D. R. (2013). The evo-devo of multinucleate cells,  
766 tissues, and organisms, and an alternative route to multicellularity. *Evolution &*  
767 *Development*, 15(6), 466-474. doi:10.1111/ede.12055
- 768 Ranjan, A., Townsley, B. T., Ichihashi, Y., Sinha, N. R., & Chitwood, D. H. (2015). An  
769 intracellular transcriptomic atlas of the giant coenocyte *Caulerpa taxifolia*. *PLoS*  
770 *Genet*, 11(1), e1004900. doi:10.1371/journal.pgen.1004900
- 771 Roberts, C. T., Jr., & Kurre, P. (2013). Vesicle trafficking and RNA transfer add complexity and  
772 connectivity to cell-cell communication. *Cancer Res*, 73(11), 3200-3205.  
773 doi:10.1158/0008-5472.CAN-13-0265
- 774 Robinson, M. D., McCarthy, D. J., & Smyth, G. K. (2010). edgeR: a Bioconductor package for  
775 differential expression analysis of digital gene expression data. *Bioinformatics*, 26(1),  
776 139-140. doi:10.1093/bioinformatics/btp616
- 777 Schneider, S. U., Leible, M. B., & Yang, X. P. (1989). Strong Homology between the Small  
778 Subunit of Ribulose-1,5-Bisphosphate Carboxylase Oxygenase of 2 Species of  
779 *Acetabularia* and the Occurrence of Unusual Codon Usage. *Molecular and General*  
780 *Genetics*, 218(3), 445-452. doi:Doi 10.1007/Bf00332408
- 781 Schweiger, H.-G. (1977). Transcription of the Nuclear Genome of *Acetabularia*. In L. Bogorad  
782 & J. H. Weil (Eds.), *Nucleic Acids and Protein Synthesis in Plants* (pp. 65-83). Boston,  
783 MA: Springer US.
- 784 Serikawa, K. A., & Mandoli, D. F. (1999). Aaknox1, a kn1-like homeobox gene in *Acetabularia*  
785 acetabulum, undergoes developmentally regulated subcellular localization. *Plant Mol*  
786 *Biol*, 41(6), 785-793.
- 787 Serikawa, K. A., Porterfield, D. M., & Mandoli, D. F. (2001). Asymmetric subcellular mRNA  
788 distribution correlates with carbonic anhydrase activity in *Acetabularia acetabulum*.  
789 *Plant Physiology*, 125(2), 900-911. doi:DOI 10.1104/pp.125.2.900
- 790 Simao, F. A., Waterhouse, R. M., Ioannidis, P., Kriventseva, E. V., & Zdobnov, E. M. (2015).  
791 BUSCO: assessing genome assembly and annotation completeness with single-copy  
792 orthologs. *Bioinformatics*, 31(19), 3210-3212. doi:10.1093/bioinformatics/btv351
- 793 Skog, J., Wurdinger, T., van Rijn, S., Meijer, D. H., Gainche, L., Sena-Estevés, M., . . .  
794 Breakefield, X. O. (2008). Glioblastoma microvesicles transport RNA and proteins that



795 promote tumour growth and provide diagnostic biomarkers. *Nature Cell Biology*,  
796 10(12), 1470-U1209. doi:10.1038/ncb1800

797 St Johnston, D. (2005). Moving messages: The intracellular localization of mRNAs. *Nature*  
798 *Reviews Molecular Cell Biology*, 6(5), 363-375. doi:10.1038/nrm1643

799 Stich, H., & Plaut, W. (1958). The effect of ribonuclease on protein synthesis in nucleated  
800 and enucleated fragments of *Acetabularia*. *J Biophys Biochem Cytol*, 4(1), 119-121.  
801 doi:10.1083/jcb.4.1.119

802 Toloue, M., Risinger, J., & Nakashe, P. (2013). Molecular Indexing for Improved RNA-Seq  
803 Analysis. *Journal of Molecular Diagnostics*, 15(6), 939-939. Retrieved from <Go to  
804 ISI>://WOS:000326668000374

805 Vogel, H., Grieninger, G. E., & Zetsche, K. H. (2002). Differential messenger RNA gradients in  
806 the unicellular alga *Acetabularia acetabulum*. Role of the cytoskeleton. *Plant*  
807 *Physiology*, 129(3), 1407-1416. doi:10.1104/pp.010983

808 Vugrek, O., Sawitzky, H., & Menzel, D. (2003). Class XIII myosins from the green alga  
809 *Acetabularia*: driving force in organelle transport and tip growth? *J Muscle Res Cell*  
810 *Motil*, 24(1), 87-97. doi:10.1023/a:1024898520419

811 Werz, G. (1955). Kernphysiologische Untersuchungen an *Acetabularia*. *Planta*, 46(2), 113-  
812 153. doi:Doi 10.1007/Bf01963403

813 Wickens, M. (1992). Forward, backward, how much, when: mechanisms of poly(A) addition  
814 and removal and their role in development. *Semin. Dev. Biol.*, 3, 399-412.

815 Wickham, H. (2016). *ggplot2: Elegant Graphics for Data Analysis*: Springer-Verlag New York.

816 Yasinovski, V. G., Zubarev, T. N., Rogatykh, N. P., & Yanushevich, I. V. (1979). Kinetics of  
817 synthesis and distribution of the morphogenetic substances in whole cells and in  
818 anucleate fragments of *Acetabularia mediterranea*. In S. Bonotto, V. Kefeli, & S.  
819 Puisseux-Dao (Eds.), *Developmental biology of Acetabularia* (Vol. 3, pp. 65-70).  
820 Amsterdam, Holland  
821 New York, NY  
822 Oxford, England: Elsevier/North\_Holland Biomedical Press.

823 Young, M. D., Wakefield, M. J., Smyth, G. K., & Oshlack, A. (2010). Gene ontology analysis for  
824 RNA-seq: accounting for selection bias. *Genome Biology*, 11(2). doi:ARTN R14  
825 10.1186/gb-2010-11-2-r14  
826  
827  
828

## 829 Supplementary information

### 830 Supplementary tables

831  
832 **Table S1.** Chloroplast genomes used as BLAST database to identify *Acetabularia acetabulum*  
833 chloroplast transcripts.

| Organism                                                                                             | Size (bp) | Accession |
|------------------------------------------------------------------------------------------------------|-----------|-----------|
| Bacillariophyta;Coccosinodiscophyceae;Coccosinodisciales;Coccosinodiscaceae;Coccosinodiscus radiatus | 122213    | NC_024081 |
| Bacillariophyta;Coccosinodiscophyceae;Rhizosoleniales;Rhizosoleniaceae;Rhizosolenia imbricata        | 120956    | NC_025311 |
| Bacillariophyta;Mediophyceae;Chaetocerotales;Chaetocerotaceae;Chaetoceros simplex                    | 116459    | NC_025310 |
| Bacillariophyta;Mediophyceae;Hemiaulales;Hemiaulaceae;Cerataulina daemon                             | 120144    | NC_025313 |
| Bacillariophyta;Mediophyceae;Lithodesmiales;Lithodesmiaceae;Lithodesmium undulatum                   | 122660    | NC_024085 |
| Bacillariophyta;Mediophyceae;Thalassiosirales;Thalassiosiraceae;Roundia cardiophora                  | 126871    | NC_025312 |
| Bacillariophyta;Fragilariophyceae;Fragilariales;Fragilariaceae;Asterionellopsis glacialis            | 146024    | NC_024080 |
| Chlorophyta;Chlorophyceae;Chlamydomonadales;Chlamydomonadales incertae sedis;Ettlia pseudoalveolaris | 145947    | NC_025332 |
| Chlorophyta;Chlorophyceae;Oedogoniales;Oedogoniaceae;Oedocladium carolinianum                        | 204438    | NC_031510 |
| Chlorophyta;Chlorophyceae;Sphaeropleales;Bracteacoccaceae;Bracteacoccus minor                        | 192761    | NC_029674 |
| Chlorophyta;Chlorophyceae;Sphaeropleales;Bracteacoccaceae;Bracteacoccus aerius                       | 165732    | NC_029675 |
| Chlorophyta;Chlorophyceae;Sphaeropleales;Bracteacoccaceae;Bracteacoccus giganteus                    | 242897    | NC_028586 |
| Chlorophyta;Chlorophyceae;Sphaeropleales;Chromochloridaceae;Chromochloris zofingiensis               | 188935    | NC_029672 |
| Chlorophyta;Chlorophyceae;Sphaeropleales;Neochloridaceae;Neochloris aquatica                         | 166767    | NC_029670 |
| Chlorophyta;Chlorophyceae;Sphaeropleales;Scenedesmaceae;Acutodesmus obliquus                         | 161452    | NC_008101 |
| Chlorophyta;Pedinophyceae;Pedinomonadales;Pedinomonadaceae;Pedinomonas tuberculata                   | 126694    | NC_025330 |
| Chlorophyta;Trebouxiophyceae;Chlorellales;Chlorellaceae;Auxenochlorella protothecoides               | 84576     | NC_023775 |
| Chlorophyta;Trebouxiophyceae;Chlorellales;Chlorellaceae;Pabia signiensis                             | 236463    | NC_025329 |
| Chlorophyta;Trebouxiophyceae;Microthamniales;;Stichococcus bacillaris                                | 116952    | NC_025327 |
| Chlorophyta;Trebouxiophyceae;Microthamniales;;Elliptochloris bilobata                                | 134677    | NC_025348 |
| Chlorophyta;Trebouxiophyceae;Microthamniales;Microthamniaceae;Fusochloris perforata                  | 148459    | NC_025343 |
| Chlorophyta;Trebouxiophyceae;Microthamniales;Microthamniaceae;Microthamnion kuetzingianum            | 158609    | NC_025337 |
| Chlorophyta;Trebouxiophyceae;Prasiolales;Koliellaceae;Koliella longiseta                             | 197094    | NC_025331 |
| Chlorophyta;Trebouxiophyceae;Prasiolales;Prasiolaceae;Chlorella mirabilis                            | 167972    | NC_025328 |

|                                                                                                   |        |           |
|---------------------------------------------------------------------------------------------------|--------|-----------|
| Chlorophyta;Trebouxiophyceae;Trebouxiophyceae incertae sedis;Coccomyxaceae;Choricystis parasitica | 94206  | NC_025539 |
| Chlorophyta;Trebouxiophyceae;Trebouxiophyceae incertae sedis;Coccomyxaceae;Paradoxia multisetata  | 183394 | NC_025540 |
| Chlorophyta;Trebouxiophyceae;Trebouxiales;Botryococcaceae;Botryococcus braunii                    | 172826 | NC_025545 |
| Chlorophyta;Trebouxiophyceae;Trebouxiales;Trebouxiaceae;Myrmecia israelensis                      | 146596 | NC_025525 |
| Chlorophyta;Ulvophyceae;Bryopsidales;Caulerpaceae;Caulerpa cliftonii                              | 131135 | NC_031368 |
| Chlorophyta;Ulvophyceae;Bryopsidales;Caulerpaceae;Caulerpa racemosa                               | 176522 | NC_032042 |
| Chlorophyta;Ulvophyceae;Bryopsidales;Codiaceae;Codium simulans                                    | 91509  | NC_032043 |
| Chlorophyta;Ulvophyceae;Ignatiales;Ignatiaceae;Ignatius tetrasporus                               | 239387 | NC_034712 |
| Chlorophyta;Ulvophyceae;Ignatiales;Ignatiaceae;Pseudocharacium americanum                         | 239448 | NC_034711 |
| Chlorophyta;Ulvophyceae;Oltmannsiellopsidales;Oltmannsiellopsidaceae;Neodangemania microcystis    | 166355 | NC_034713 |
| Chlorophyta;Ulvophyceae;Ulotrichales;Hazeniaceae;Hazenaria capsulata                              | 189599 | NC_034714 |
| Chlorophyta;Ulvophyceae;Ulotrichales;Ulotrichaceae;Gloeotilopsis sterilis                         | 132626 | NC_025538 |
| Chlorophyta;Ulvophyceae;Ulotrichales;Ulotrichales familia incertae sedis;Trichosarcina mucosa     | 227181 | NC_034709 |
| Chlorophyta;Ulvophyceae;Ulvaes;Ulvaceae;Pseudoneochloris marina                                   | 134753 | NC_034710 |
| Chlorophyta;Ulvophyceae;Ulvaes;Ulvaceae;Ulva fasciata                                             | 96005  | NC_029040 |
| Chlorophyta;Ulvophyceae;Ulvaes;Ulvaceae;Ulva linza                                                | 86726  | NC_030312 |
| Chlorophyta;Ulvophyceae;Ulvaes;Ulvaceae;Ulva flexuosa                                             | 89414  | NC_035823 |
| Chlorophyta;Ulvophyceae;Ulvaes;Ulvaceae;Ulva prolifera                                            | 93066  | NC_036137 |
| Charophyta;Zygnemophyceae;Zygnematales;Mesotaeniaceae;Roya anglica                                | 138275 | NC_024168 |
| Charophyta;Zygnemophyceae;Zygnematales;Mesotaeniaceae;Mesotaenium endlicherianum                  | 142017 | NC_024169 |
| Euglenozoa;Euglenophyceae;Euglenales;Euglenaceae;Monomorphina parapyrum                           | 80147  | NC_027287 |
| Euglenozoa;Euglenophyceae;Euglenales;Euglenaceae;Trachelomonas volvocina                          | 85392  | NC_027288 |
| Euglenozoa;Euglenophyceae;Euglenales;Euglenaceae;Euglenaria anabaena                              | 88487  | NC_027269 |
| Haptophyta;Coccolithophyceae;Phaeocystales;Phaeocystaceae;Phaeocystis antarctica                  | 105512 | NC_016703 |
| Haptophyta;Coccolithophyceae;Phaeocystales;Phaeocystaceae;Phaeocystis globosa                     | 107461 | NC_021637 |
| Ochrophyta;Eustigmatophyceae;Eustigmatales;Monodopsidaceae;Nannochloropsis granulata              | 117672 | NC_022259 |
| Ochrophyta;Phaeophyceae;Laminariales;Laminariaceae;Saccharina japonica                            | 130584 | NC_018523 |
| Rhodophyta;Bangiophyceae;Bangiales;Bangiaceae;Pyropia perforata                                   | 189789 | NC_024050 |
| Rhodophyta;Compsopogonophyceae;Compsopogonales;Boldiaceae;Boldia erythrosiphon                    | 226658 | NC_034776 |
| Rhodophyta;Florideophyceae;Gracilariales;Gracilariaceae;Gracilaria salicornia                     | 179757 | NC_023785 |

|                                                                                     |        |           |
|-------------------------------------------------------------------------------------|--------|-----------|
| Rhodophyta;Porphyridiophyceae;Porphyridiales;Porphyridiaceae;Porphyridium purpureum | 217694 | NC_023133 |
| Streptophyta;Zygnemophyceae;Desmidiales;Desmidiaceae;Cosmarium botrytis             | 207850 | NC_030357 |
| Streptophyta;Zygnemophyceae;Zygnematales;Zygnemataceae ;Entransia fimbriata         | 206025 | NC_030313 |
| Streptophyta;Zygnemophyceae;Zygnematales;Zygnemataceae ;Spirogyra maxima            | 129954 | NC_030355 |
| Streptophyta;Zygnemophyceae;Zygnematales;Zygnemataceae ;Netrium digitus             | 131804 | NC_030356 |

---

834

835 **Table S2.** Mitochondrial genomes used as BLAST database to identify *Acetabularia acetabulum*  
 836 mitochondrial transcripts

| Organism                                                                                                                                         | Size (bp) | Accession     |
|--------------------------------------------------------------------------------------------------------------------------------------------------|-----------|---------------|
| Eukaryota;Stramenopiles;PX clade;Phaeophyceae;Laminariales;Laminariaceae;Saccharina;Saccharina latissima                                         | 3765<br>9 | NC_02<br>6108 |
| Eukaryota;Sar;Stramenopiles;Ochrophyta;PX clade;Phaeophyceae;Laminariales;Laminariaceae;Saccharina;Saccharina japonica                           | 3765<br>7 | NC_01<br>3476 |
| Eukaryota;Stramenopiles;Eustigmatophyceae;Eustigmatales;Monodopsidaceae;Nannochloropsis;Nannochloropsis oceanica                                 | 3805<br>7 | NC_02<br>2258 |
| Eukaryota;Rhodophyta;Florideophyceae;Rhodymeniophycidae;Gracilariales;Gracilariaceae;Gracilaria;Gracilaria salicornia                            | 2527<br>2 | NC_02<br>3784 |
| Eukaryota;Viridiplantae;Streptophyta;Zygnemophyceae;Zygnematales;Mesotaeniaceae;Roya;Roya obtusa                                                 | 6946<br>5 | NC_02<br>2863 |
| Eukaryota;Rhodophyta;Bangiophyceae;Bangiales;Bangiaceae;Pyropia;Pyropia nitida                                                                   | 3531<br>3 | NC_02<br>7616 |
| Eukaryota;Viridiplantae;Chlorophyta;Trebouxiophyceae;Trebouxiophyceae incertae sedis;Botryococcaceae;Botryococcus;Botryococcus braunii           | 8458<br>3 | NC_02<br>7722 |
| Eukaryota;Viridiplantae;Chlorophyta;Trebouxiophyceae;Chlorellales;Chlorellaceae;Chlorella                                                        | 5252<br>8 | NC_02<br>4626 |
| Eukaryota;Viridiplantae;Chlorophyta;Trebouxiophyceae;Chlorellales;Chlorellaceae;Auxenochlorella;Auxenochlorella protothecoides                   | 5727<br>4 | NC_02<br>6009 |
| Eukaryota;Viridiplantae;Chlorophyta;core chlorophytes;Trebouxiophyceae;Chlorellales;Chlorellaceae;Chlorella clade;Chlorella;Chlorella variabilis | 7850<br>0 | NC_02<br>5413 |
| Eukaryota;Viridiplantae;Chlorophyta;Pedinophyceae;Pedinomonadales;Pedinomonadaceae;Pedinomonas;Pedinomonas minor                                 | 2513<br>7 | NC_00<br>0892 |
| Eukaryota;Viridiplantae;Chlorophyta;Chlorophyceae;Sphaeropleales;Neochloridaceae;Neochloris;Neochloris aquatica                                  | 3802<br>1 | NC_02<br>4761 |
| Eukaryota;Viridiplantae;Chlorophyta;Chlorophyceae;Sphaeropleales;Chromochloridaceae;Chromochloris;Chromochloris zofingiensis                     | 4484<br>0 | NC_02<br>4758 |
| Eukaryota;Viridiplantae;Chlorophyta;Chlorophyceae;Sphaeropleales;Neochloridaceae;Chlorotetraedron;Chlorotetraedron incus                         | 3840<br>6 | NC_02<br>4757 |
| Eukaryota;Viridiplantae;Chlorophyta;Chlorophyceae;Sphaeropleales;Bracteacoccaceae;Bracteacoccus;Bracteacoccus aerius                             | 4715<br>8 | NC_02<br>4755 |
| Eukaryota;Viridiplantae;Chlorophyta;Chlorophyceae;Sphaeropleales;Bracteacoccaceae;Bracteacoccus;Bracteacoccus minor                              | 4517<br>5 | NC_02<br>4756 |
| Eukaryota;Viridiplantae;Streptophyta;Zygnemophyceae;Zygnematales;Zygnemataceae;Entransia;Entransia fimbriata                                     | 6164<br>5 | NC_02<br>2861 |
| Eukaryota;Viridiplantae;Chlorophyta;Ulvophyceae;OUU clade;Ulvaes;Ulvaceae;Ulva;Ulva fasciata                                                     | 6161<br>4 | NC_02<br>8081 |
| Eukaryota;Viridiplantae;Chlorophyta;Ulvophyceae;OUU clade;Ulvaes;Ulvaceae;Ulva;Ulva prolifera                                                    | 6384<br>5 | NC_02<br>8538 |
| Eukaryota;Viridiplantae;Chlorophyta;Ulvophyceae;OUU clade;Ulvaes;Ulvaceae;Ulva;Ulva linza                                                        | 7085<br>8 | NC_02<br>9701 |
| Eukaryota;Viridiplantae;Chlorophyta;Ulvophyceae;OUU clade;Ulvaes;Ulvaceae;Ulva;Ulva pertusa                                                      | 6933<br>3 | NC_03<br>5722 |
| Eukaryota;Viridiplantae;Chlorophyta;Ulvophyceae;OUU clade;Ulvaes;Ulvaceae;Ulva;Ulva flexuosa                                                     | 7154<br>5 | NC_03<br>5809 |
| Eukaryota;Viridiplantae;Chlorophyta;Chlorophyceae;Sphaeropleales;Selenastraceae;Ourococcus;Ourococcus multisporus                                | 4970<br>5 | NC_02<br>4762 |
| Eukaryota;Viridiplantae;Chlorophyta;Chlorophyceae;Chlamydomonadales;Chlamydomonadaeae;Polytoma;Polytoma uvella                                   | 1741<br>1 | NC_02<br>6572 |

837

838 **Table S3.** rRNA sequences from various green algae used as BLAST database to identify  
839 *Acetabularia* rRNA transcripts.

| Organism                                                                                                                                                                     | Gene                                  | Size (bp) | Accession |
|------------------------------------------------------------------------------------------------------------------------------------------------------------------------------|---------------------------------------|-----------|-----------|
| Eukaryota;Viridiplantae;Chlorophyta;Ulvophyceae;Ignatiales;Ignatius;Ignatius tetrasporus                                                                                     | 18S (partial)                         | 1744      | AB110439  |
| Eukaryota;Viridiplantae;Chlorophyta;Ulvophyceae;Ignatiales;Pseudocharacium;Pseudocharacium americanum                                                                        | 18S (partial)                         | 1743      | AB110440  |
| Eukaryota;Viridiplantae;Chlorophyta;Ulvophyceae;Oltmannsiellopsidales;Oltmannsiellopsidaceae;Oltmannsiellopsis;Oltmannsiellopsis geminata                                    | 18S (partial)                         | 1745      | AB183610  |
| Eukaryota;Viridiplantae;Chlorophyta;Ulvophyceae;TCBD clade;Dasycladales;Polyphysaceae;Acetabularia;Acetabularia acetabulum                                                   | 18S (partial)                         | 1042      | AF493616  |
| Eukaryota;Viridiplantae;Chlorophyta;Ulvophyceae;OUU clade;Ulvaes;Ulvaceae;Blidingia;Blidingia minima                                                                         | 5.8S                                  | 615       | AJ000206  |
| Eukaryota;Viridiplantae;Chlorophyta;Ulvophyceae;OUU clade;Ulvaes;Ulvaceae;Blidingia;Blidingia chadefaudii                                                                    | 5.8S                                  | 569       | AJ012309  |
| Eukaryota;Viridiplantae;Chlorophyta;Ulvophyceae;TCBD clade;Bryopsidales;Caulerpaceae;Caulerpa;Caulerpa taxifolia                                                             | 18S, 28S and 5.8S                     | 641       | AJ299742  |
| Eukaryota;Viridiplantae;Chlorophyta;Ulvophyceae;TCBD clade;Dasycladales;Polyphysaceae;Acetabularia;Acetabularia acetabulum                                                   | 18S                                   | 1773      | AY165775  |
| Eukaryota;Viridiplantae;Chlorophyta;Ulvophyceae;Ulvophyceae;incertae sedis;Oltmannsiellopsis;Oltmannsiellopsis viridis                                                       | 18S                                   | 1746      | D86495    |
| Eukaryota;Viridiplantae;Chlorophyta;core chlorophytes;Trebouxiophyceae;Chlorellales;Chlorellaceae;Chlorella clade;Actinastrum;Actinastrum hantzschii                         | 18S (partial), 5.8S and 28S (partial) | 2874      | FM205841  |
| Eukaryota;Viridiplantae;Chlorophyta;core chlorophytes;Trebouxiophyceae;Chlorellales;Chlorellaceae;Chlorella clade;Chlorella;Chlorella heliozoae                              | 18S (partial), 5.8S and 28S (partial) | 3852      | FM205850  |
| Eukaryota;Viridiplantae;Chlorophyta;core chlorophytes;Trebouxiophyceae;Chlorellales;Chlorellaceae;Chlorella clade;Actinastrum;Actinastrum hantzschii                         | 18S (partial), 5.8S and 28S (partial) | 3113      | FM205882  |
| Eukaryota;Viridiplantae;Chlorophyta;core chlorophytes;Trebouxiophyceae;Chlorellales;Chlorellaceae;Chlorella clade;Actinastrum;Actinastrum hantzschii                         | 18S (partial), 5.8S and 28S (partial) | 2530      | FM205884  |
| Eukaryota;Viridiplantae;Chlorophyta;Ulvophyceae;OUU clade;Ulotrichales;Chlorocystidaceae;Desmochloris;Desmochloris halophila                                                 | 18S (partial) and 5.8S                | 2347      | FM882216  |
| Eukaryota;Viridiplantae;Chlorophyta;Ulvophyceae;OUU clade;Ulotrichales;Chlorocystidaceae;Desmochloris;Desmochloris mollenhaueri                                              | 18S (partial) and 5.8S                | 2777      | FM882217  |
| Eukaryota;Viridiplantae;Chlorophyta;Ulvophyceae;TCBD clade;Trentepohliales;Trentepohliaceae;Trentepohlia;unclassified Trentepohlia;Trentepohlia sp. CB-2010                  | 28S (partial)                         | 549       | FR719952  |
| Eukaryota;Viridiplantae;Chlorophyta;Ulvophyceae;Oltmannsiellopsidales;Oltmannsiellopsidaceae;Oltmannsiellopsis;unclassified Oltmannsiellopsis;Oltmannsiellopsis sp. CCMP1240 | 18S (partial), 5.8S and 28S (partial) | 5585      | HE610120  |
| Eukaryota;Viridiplantae;Chlorophyta;Ulvophyceae;Ignatiales;Ignatiaceae;Ignatius;Ignatius tetrasporus                                                                         | 18S (partial), 5.8S and 28S (partial) | 3790      | HE610121  |
| Eukaryota;Viridiplantae;Chlorophyta;Ulvophyceae;OUU clade;Ulotrichales;Ulotrichaceae;Ulothrix;Ulothrix zonata                                                                | 28S (partial)                         | 583       | HE860527  |
| Eukaryota;Viridiplantae;Chlorophyta;Ulvophyceae;OUU clade;Ulvaes;Ulvaceae;Blidingia;Blidingia marginata                                                                      | 28S (partial)                         | 603       | HQ603266  |
| Eukaryota;Viridiplantae;Chlorophyta;Ulvophyceae;Ulvophyceae;incertae sedis;Smithsoniella;Smithsoniella earleae                                                               | 18S (partial)                         | 1738      | JF680958  |
| Eukaryota;Viridiplantae;Chlorophyta;core chlorophytes;Trebouxiophyceae;Chlorellales;Chlorellaceae;Chlorella clade;Chlorella;Chlorella sorokiniana                            | 18S, 5.8S and 28S (partial)           | 2527      | LK021940  |
| Eukaryota;Viridiplantae;Chlorophyta;Ulvophyceae;TCBD clade;Dasycladales;Polyphysaceae;Acetabularia;Acetabularia caliculus                                                    | 18S (partial)                         | 520       | MF579955  |
| Eukaryota;Viridiplantae;Chlorophyta;Ulvophyceae;TCBD clade;Dasycladales;Polyphysaceae;Acetabularia;Acetabularia acetabulum                                                   | 18S                                   | 1766      | Z33461    |

840



841 **Table S4.** *Chlamydomonas reinhardtii* COP and Clathrin genes used to identify similar genes in *A.*  
842 *acetabulum*

| Gene                               | Accession number |
|------------------------------------|------------------|
| alpha-COP                          | XP_001693686     |
| beta-COP                           | XP_001701255     |
| beta-COP                           | XP_001702422     |
| delta-COP                          | XP_001701763     |
| epsilon-COP                        | XP_001693085     |
| gamma-COP                          | XP_001691193     |
| zeta-COP, subunit of COP-1 complex | XP_001701294     |
| sar-type small GTPase              | XP_001699537     |
| COP-II coat subunit                | XP_001700438     |
| COP-II coat subunit                | XP_001702936     |
| COP-II coat subunit                | XP_001701974     |
| COP-II coat subunit                | XP_001697039     |
| Clathrin heavy chain               | XP_001699806     |

843

844

845 **Table S5. RNA isolation.**

|                                           | Single Cell RNA purification Kit | Total RNA purification kit | % Increase by using the Total RNA purification kit |
|-------------------------------------------|----------------------------------|----------------------------|----------------------------------------------------|
| <b>Mean total RNA yield (ng)</b>          | 33                               | 159                        | 382                                                |
| <b>Mean transcripts with count &gt; 0</b> | 51715                            | 55031                      | 6                                                  |
| <b>Mean transcripts with count &gt; 1</b> | 35019                            | 37170                      | 6                                                  |
| <b>Mean transcripts with count &gt; 2</b> | 28821                            | 30510                      | 6                                                  |
| <b>Mean transcripts with count &gt; 3</b> | 25474                            | 26897                      | 6                                                  |

846

847 **Table S6.** Assembly statistics of the *de novo* assembled transcriptome of *Acetabularia acetabulum*.  
848 Only the highest expressed isoform of each gene is represented in the transcriptome. This transcriptome  
849 was used as a mapping reference for further RNA-seq analysis.

| <i>A. acetabulum</i> transcriptome                  |             |
|-----------------------------------------------------|-------------|
| Total transcriptome size (bp)                       | 114 907 754 |
| Number of transcripts                               | 246 083     |
| Longest transcript (bp)                             | 17 196      |
| Shortest transcript (bp)                            | 201         |
| Mean transcript length (bp)                         | 467         |
| Median transcript length (bp)                       | 298         |
| N50 transcript length (bp)                          | 534         |
| -----                                               |             |
| Nuclear encoded transcripts                         | 245 334     |
| mRNAs                                               | 245 223     |
| rRNAs                                               | 111         |
| Chloroplast encoded transcripts                     | 389         |
| Mitochondrial encoded transcripts                   | 99          |
| Possible prokaryotic/unclassified transcripts       | 261         |
| -----                                               |             |
| Predicted protein coding transcripts (TransDecoder) | 114 146     |
| Nuclear                                             | 113 900     |
| Chloroplast                                         | 178         |
| Mitochondrial                                       | 68          |

850

851 **Table S7. Enriched Gene Ontologies.** Domain refers to “Cellular Component” (CC), “Biological  
 852 Process” (BP) and “Molecular Function” (MF). FDR refers to the False Discovery Rates calculated on  
 853 the p-values by the qvalue function in the R package qvalue. The “%” in the Cap, Stalk and Rhizoid is  
 854 the percentage of GO-ID’s in the enriched pool of transcripts (in the Cap, Stalk or Rhizoid) compared  
 855 to the number in the total transcriptome.

| ID         | Term                                           | Domain | Cap FDR  | Cap % | Stalk FDR | Stalk % | Rhizoid FDR | Rhizoid % |
|------------|------------------------------------------------|--------|----------|-------|-----------|---------|-------------|-----------|
| GO:0005623 | cell                                           | CC     | 4.3E-181 | 20    | 4.9E-34   | 5       | 1.1E-208    | 23.2      |
| GO:0009536 | plastid                                        | CC     | 2.2E-103 | 35    | 3.3E-04   | 4       | 1.5E-02     | 8.1       |
| GO:0009579 | thylakoid                                      | CC     | 1.8E-60  | 47    | 0         | 0       | 0           | 0         |
| GO:0006950 | response to stress                             | BP     | 1.0E-40  | 23    | 3.8E-06   | 5       | 8.3E-30     | 22        |
| GO:0009058 | biosynthetic process                           | BP     | 1.5E-37  | 23    | 4.6E-07   | 6       | 1.3E-32     | 23        |
| GO:0005829 | cytosol                                        | CC     | 2.7E-31  | 19    | 6.0E-06   | 4       | 1.3E-47     | 24        |
| GO:0043167 | ion binding                                    | MF     | 5.3E-28  | 26    | 0         | 0       | 6.4E-17     | 22        |
| GO:0005886 | plasma membrane                                | CC     | 2.5E-25  | 22    | 6.3E-03   | 4       | 1.1E-24     | 24        |
| GO:0022857 | transmembrane transporter activity             | MF     | 2.5E-25  | 40    | 4.0E-03   | 7       | 9.9E-03     | 12        |
| GO:0044281 | small molecule metabolic process               | BP     | 5.4E-25  | 29    | 2.8E-05   | 7       | 5.0E-10     | 20        |
| GO:0016491 | oxidoreductase activity                        | MF     | 5.7E-23  | 34    | 0         | 0       | 2.3E-03     | 13        |
| GO:0005773 | vacuole                                        | CC     | 3.7E-21  | 27    | 2.4E-03   | 5       | 1.3E-05     | 15        |
| GO:0051186 | cofactor metabolic process                     | BP     | 2.0E-20  | 34    | 1.1E-02   | 6       | 7.7E-04     | 14        |
| GO:0015979 | photosynthesis                                 | BP     | 8.1E-20  | 38    | 0         | 0       | 0           | 0         |
| GO:0005739 | mitochondrion                                  | CC     | 9.3E-20  | 24    | 2.1E-02   | 4       | 4.0E-11     | 20        |
| GO:0032991 | protein-containing complex                     | CC     | 8.8E-18  | 14    | 3.7E-07   | 5       | 3.9E-86     | 29        |
| GO:0065003 | protein-containing complex assembly            | BP     | 2.3E-17  | 26    | 0         | 0       | 2.1E-22     | 31        |
| GO:0006091 | generation of precursor metabolites and energy | BP     | 3.8E-17  | 29    | 0         | 0       | 3.2E-03     | 11        |
| GO:0042592 | homeostatic process                            | BP     | 1.9E-16  | 28    | 0         | 0       | 2.2E-08     | 21        |
| GO:0006520 | cellular amino acid metabolic process          | BP     | 6.0E-16  | 36    | 0         | 0       | 3.4E-05     | 20        |
| GO:0005576 | extracellular region                           | CC     | 1.0E-15  | 31    | 2.0E-02   | 6       | 1.0E-03     | 14        |
| GO:0006629 | lipid metabolic process                        | BP     | 1.2E-15  | 29    | 6.7E-03   | 6       | 1.0E-05     | 19        |
| GO:0005794 | Golgi apparatus                                | CC     | 1.4E-15  | 26    | 5.2E-03   | 6       | 1.6E-05     | 17        |
| GO:0016887 | ATPase activity                                | MF     | 4.2E-15  | 34    | 0         | 0       | 1.8E-03     | 16        |
| GO:0019899 | enzyme binding                                 | MF     | 6.7E-15  | 27    | 8.4E-04   | 7       | 1.8E-08     | 21        |
| GO:0005783 | endoplasmic reticulum                          | CC     | 2.8E-13  | 24    | 0         | 0       | 1.3E-13     | 26        |
| GO:0005840 | ribosome                                       | CC     | 2.5E-12  | 15    | 0         | 0       | 4.2E-18     | 21        |
| GO:0006790 | sulfur compound metabolic process              | BP     | 3.0E-12  | 38    | 0         | 0       | 4.3E-03     | 16        |
| GO:0009056 | catabolic process                              | BP     | 4.0E-12  | 23    | 3.8E-06   | 9       | 1.1E-06     | 18        |
| GO:0007165 | signal transduction                            | BP     | 1.1E-11  | 18    | 7.7E-05   | 6       | 9.1E-21     | 26        |
| GO:0003735 | structural constituent of ribosome             | MF     | 3.7E-11  | 15    | 0         | 0       | 7.5E-14     | 18        |
| GO:0000003 | reproduction                                   | BP     | 3.9E-11  | 18    | 9.6E-04   | 5       | 7.4E-22     | 26        |
| GO:0034641 | cellular nitrogen compound metabolic process   | BP     | 4.6E-11  | 17    | 3.4E-03   | 4       | 1.7E-22     | 24        |
| GO:0061024 | membrane organization                          | BP     | 1.6E-10  | 27    | 4.7E-02   | 5       | 2.7E-08     | 24        |

|            |                                                          |    |         |    |         |    |         |    |
|------------|----------------------------------------------------------|----|---------|----|---------|----|---------|----|
| GO:0006605 | protein targeting                                        | BP | 1.6E-10 | 24 | 0       | 0  | 5.4E-07 | 20 |
| GO:0016192 | vesicle-mediated transport                               | BP | 1.8E-10 | 22 | 4.0E-06 | 9  | 3.6E-10 | 23 |
| GO:0048856 | anatomical structure development                         | BP | 1.9E-10 | 17 | 4.7E-08 | 8  | 5.0E-18 | 23 |
| GO:0006412 | translation                                              | BP | 1.1E-09 | 15 | 2.2E-02 | 3  | 2.1E-20 | 24 |
| GO:0007568 | aging                                                    | BP | 1.6E-09 | 33 | 0       | 0  | 8.3E-05 | 22 |
| GO:0005618 | cell wall                                                | CC | 8.4E-09 | 22 | 0       | 0  | 2.6E-05 | 17 |
| GO:0048646 | anatomical structure formation involved in morphogenesis | BP | 9.4E-09 | 24 | 0       | 0  | 9.0E-06 | 20 |
| GO:0009790 | embryo development                                       | BP | 1.3E-08 | 23 | 0       | 0  | 2.3E-09 | 25 |
| GO:0002376 | immune system process                                    | BP | 2.1E-08 | 20 | 3.2E-02 | 5  | 2.3E-13 | 28 |
| GO:0016829 | lyase activity                                           | MF | 4.5E-08 | 32 | 0       | 0  | 9.3E-04 | 19 |
| GO:0006810 | transport                                                | BP | 4.5E-08 | 35 | 0       | 0  | 9.6E-05 | 25 |
| GO:0006464 | cellular protein modification process                    | BP | 6.4E-08 | 15 | 9.6E-04 | 5  | 4.0E-31 | 29 |
| GO:0030154 | cell differentiation                                     | BP | 8.7E-08 | 17 | 5.4E-03 | 5  | 1.0E-20 | 29 |
| GO:0008219 | cell death                                               | BP | 1.4E-07 | 21 | 8.4E-03 | 7  | 4.0E-09 | 25 |
| GO:0003013 | circulatory system process                               | BP | 1.7E-07 | 60 | 0       | 0  | 0       | 0  |
| GO:0034655 | nucleobase-containing compound catabolic process         | BP | 3.4E-07 | 18 | 1.2E-02 | 5  | 1.5E-09 | 23 |
| GO:0007267 | cell-cell signaling                                      | BP | 4.4E-07 | 30 | 5.2E-03 | 11 | 2.3E-07 | 32 |
| GO:0005764 | lysosome                                                 | CC | 4.7E-07 | 29 | 5.2E-03 | 10 | 8.8E-03 | 15 |
| GO:0005975 | carbohydrate metabolic process                           | BP | 4.9E-07 | 20 | 3.8E-06 | 11 | 1.5E-04 | 17 |
| GO:0031410 | cytoplasmic vesicle                                      | CC | 6.2E-07 | 27 | 1.2E-03 | 11 | 3.1E-04 | 20 |
| GO:0005768 | endosome                                                 | CC | 1.4E-06 | 20 | 7.1E-03 | 7  | 1.9E-09 | 25 |
| GO:0005634 | nucleus                                                  | CC | 1.8E-06 | 14 | 8.7E-04 | 5  | 3.3E-33 | 30 |
| GO:0055085 | transmembrane transport                                  | BP | 2.6E-06 | 26 | 0       | 0  | 1.1E-03 | 19 |
| GO:0016301 | kinase activity                                          | MF | 3.4E-06 | 20 | 0       | 0  | 4.5E-07 | 23 |
| GO:0015031 | protein transport                                        | BP | 5.8E-06 | 18 | 4.0E-03 | 7  | 9.1E-17 | 33 |
| GO:0007010 | cytoskeleton organization                                | BP | 1.0E-05 | 18 | 0       | 0  | 4.6E-28 | 43 |
| GO:0005856 | cytoskeleton                                             | CC | 1.1E-05 | 18 | 0       | 0  | 1.3E-20 | 39 |
| GO:0021700 | developmental maturation                                 | BP | 1.4E-05 | 33 | 0       | 0  | 1.5E-02 | 17 |
| GO:0042254 | ribosome biogenesis                                      | BP | 1.8E-05 | 12 | 0       | 0  | 1.0E-16 | 24 |
| GO:0008092 | cytoskeletal protein binding                             | MF | 2.0E-05 | 20 | 0       | 0  | 2.5E-13 | 36 |
| GO:0019748 | secondary metabolic process                              | BP | 2.4E-05 | 36 | 0       | 0  | 1.3E-02 | 18 |
| GO:0007034 | vacuolar transport                                       | BP | 2.9E-05 | 27 | 3.2E-02 | 9  | 1.3E-02 | 16 |
| GO:0051604 | protein maturation                                       | BP | 2.9E-05 | 29 | 0       | 0  | 2.9E-03 | 20 |
| GO:0008233 | peptidase activity                                       | MF | 2.9E-05 | 20 | 1.2E-03 | 9  | 1.5E-03 | 16 |
| GO:0016874 | ligase activity                                          | MF | 4.4E-05 | 24 | 0       | 0  | 2.4E-05 | 26 |
| GO:0050877 | nervous system process                                   | BP | 4.6E-05 | 29 | 0       | 0  | 2.5E-06 | 35 |
| GO:0051301 | cell division                                            | BP | 4.7E-05 | 19 | 2.8E-02 | 6  | 2.7E-14 | 36 |
| GO:0000902 | cell morphogenesis                                       | BP | 5.2E-05 | 18 | 0       | 0  | 1.0E-13 | 32 |
| GO:0003723 | RNA binding                                              | MF | 7.4E-05 | 15 | 3.1E-05 | 9  | 4.7E-10 | 24 |
| GO:0003729 | mRNA binding                                             | MF | 8.5E-05 | 13 | 0       | 0  | 9.0E-07 | 17 |
| GO:0005730 | nucleolus                                                | CC | 1.2E-04 | 12 | 0       | 0  | 1.3E-12 | 22 |
| GO:0040007 | growth                                                   | BP | 1.5E-04 | 15 | 0       | 0  | 1.7E-14 | 29 |

|            |                                                                             |    |         |    |         |    |         |    |
|------------|-----------------------------------------------------------------------------|----|---------|----|---------|----|---------|----|
| GO:0016853 | isomerase activity                                                          | MF | 1.7E-04 | 22 | 0       | 0  | 3.9E-09 | 37 |
| GO:0007005 | mitochondrion organization                                                  | BP | 1.7E-04 | 22 | 0       | 0  | 2.6E-05 | 25 |
| GO:0006914 | autophagy                                                                   | BP | 2.1E-04 | 21 | 0       | 0  | 2.0E-05 | 26 |
| GO:0005929 | cilium                                                                      | CC | 4.3E-04 | 22 | 0       | 0  | 4.0E-18 | 59 |
| GO:0005777 | peroxisome                                                                  | CC | 5.0E-04 | 24 | 1.1E-02 | 12 | 7.4E-03 | 18 |
| GO:0030234 | enzyme regulator activity                                                   | MF | 5.1E-04 | 16 | 3.4E-03 | 9  | 1.4E-11 | 34 |
| GO:0005815 | microtubule organizing center                                               | CC | 5.1E-04 | 22 | 0       | 0  | 4.9E-09 | 42 |
| GO:0016791 | phosphatase activity                                                        | MF | 5.5E-04 | 19 | 3.1E-04 | 13 | 6.0E-03 | 16 |
| GO:0019843 | rRNA binding                                                                | MF | 6.8E-04 | 16 | 0       | 0  | 2.5E-06 | 25 |
| GO:0044403 | symbiont process                                                            | BP | 7.2E-04 | 20 | 0       | 0  | 5.8E-07 | 32 |
| GO:0030198 | extracellular matrix organization                                           | BP | 7.4E-04 | 30 | 0       | 0  | 1.3E-02 | 20 |
| GO:0007155 | cell adhesion                                                               | BP | 7.7E-04 | 22 | 0       | 0  | 8.1E-07 | 37 |
| GO:0006913 | nucleocytoplasmic transport                                                 | BP | 8.0E-04 | 16 | 0       | 0  | 4.3E-09 | 31 |
| GO:0022607 | cellular component assembly                                                 | BP | 8.4E-04 | 15 | 1.8E-02 | 7  | 5.5E-09 | 27 |
| GO:0005615 | extracellular space                                                         | CC | 9.3E-04 | 18 | 1.2E-03 | 12 | 2.1E-02 | 12 |
| GO:0016757 | transferase activity, transferring glycosyl groups                          | MF | 1.1E-03 | 24 | 0       | 0  | 3.2E-02 | 14 |
| GO:0006457 | protein folding                                                             | BP | 1.2E-03 | 20 | 0       | 0  | 4.2E-06 | 31 |
| GO:0016765 | transferase activity, transferring alkyl or aryl (other than methyl) groups | MF | 1.2E-03 | 26 | 0       | 0  | 2.1E-02 | 16 |
| GO:0071554 | cell wall organization or biogenesis                                        | BP | 1.4E-03 | 19 | 3.8E-06 | 19 | 0       | 0  |
| GO:0008289 | lipid binding                                                               | MF | 1.9E-03 | 18 | 0       | 0  | 3.7E-04 | 22 |
| GO:0030705 | cytoskeleton-dependent intracellular transport                              | BP | 2.3E-03 | 29 | 0       | 0  | 5.5E-06 | 50 |
| GO:0005198 | structural molecule activity                                                | MF | 2.3E-03 | 24 | 0       | 0  | 1.9E-04 | 32 |
| GO:0005635 | nuclear envelope                                                            | CC | 3.2E-03 | 19 | 0       | 0  | 1.2E-08 | 40 |
| GO:0003677 | DNA binding                                                                 | MF | 5.7E-03 | 12 | 3.2E-02 | 6  | 2.3E-19 | 38 |
| GO:0006399 | tRNA metabolic process                                                      | BP | 6.3E-03 | 15 | 0       | 0  | 5.9E-10 | 36 |
| GO:0022618 | ribonucleoprotein complex assembly                                          | BP | 6.9E-03 | 9  | 0       | 0  | 2.4E-09 | 24 |
| GO:0008283 | cell proliferation                                                          | BP | 6.9E-03 | 13 | 5.0E-03 | 8  | 2.0E-11 | 34 |
| GO:0005622 | intracellular                                                               | CC | 7.4E-03 | 21 | 0       | 0  | 1.1E-06 | 47 |
| GO:0003700 | DNA-binding transcription factor activity                                   | MF | 7.4E-03 | 17 | 0       | 0  | 3.3E-03 | 20 |
| GO:0140014 | mitotic nuclear division                                                    | BP | 7.8E-03 | 20 | 0       | 0  | 7.9E-04 | 28 |
| GO:0008135 | translation factor activity, RNA binding                                    | MF | 8.0E-03 | 19 | 4.5E-02 | 13 | 2.5E-04 | 31 |
| GO:0007049 | cell cycle                                                                  | BP | 8.1E-03 | 14 | 0       | 0  | 4.6E-12 | 39 |
| GO:0071941 | nitrogen cycle metabolic process                                            | BP | 8.5E-03 | 40 | 0       | 0  | 4.5E-02 | 20 |
| GO:0007009 | plasma membrane organization                                                | BP | 8.9E-03 | 50 | 0       | 0  | 4.7E-02 | 25 |
| GO:0048870 | cell motility                                                               | BP | 1.0E-02 | 13 | 0       | 0  | 1.3E-20 | 49 |
| GO:0005737 | cytoplasm                                                                   | CC | 1.5E-02 | 10 | 8.7E-04 | 6  | 4.7E-39 | 37 |
| GO:0000278 | mitotic cell cycle                                                          | BP | 1.5E-02 | 11 | 2.4E-03 | 8  | 2.2E-19 | 40 |
| GO:0043226 | organelle                                                                   | CC | 2.1E-02 | 17 | 8.7E-04 | 22 | 2.2E-02 | 17 |
| GO:0040011 | locomotion                                                                  | BP | 2.5E-02 | 14 | 0       | 0  | 8.3E-10 | 57 |

|            |                                                                       |    |         |    |         |    |         |    |
|------------|-----------------------------------------------------------------------|----|---------|----|---------|----|---------|----|
| GO:0016810 | hydrolase activity, acting on carbon-nitrogen (but not peptide) bonds | MF | 2.5E-02 | 18 | 0       | 0  | 0       | 0  |
| GO:0016746 | transferase activity, transferring acyl groups                        | MF | 3.0E-02 | 14 | 1.8E-02 | 14 | 2.8E-07 | 48 |
| GO:0006259 | DNA metabolic process                                                 | BP | 3.1E-02 | 9  | 0       | 0  | 4.6E-28 | 38 |
| GO:0051082 | unfolded protein binding                                              | MF | 3.5E-02 | 15 | 0       | 0  | 2.8E-04 | 38 |
| GO:0005654 | nucleoplasm                                                           | CC | 3.6E-02 | 8  | 0       | 0  | 1.1E-38 | 38 |
| GO:0003924 | GTPase activity                                                       | MF | 3.6E-02 | 11 | 0       | 0  | 2.9E-08 | 40 |
| GO:0000229 | cytoplasmic chromosome                                                | CC | 4.2E-02 | 33 | 6.3E-03 | 67 | 0       | 0  |
| GO:0004518 | nuclease activity                                                     | MF | 4.5E-02 | 10 | 1.7E-02 | 9  | 7.4E-09 | 34 |
| GO:0005811 | lipid droplet                                                         | CC | 4.5E-02 | 20 | 0       | 0  | 5.0E-04 | 60 |
| GO:0032196 | transposition                                                         | BP | 4.9E-02 | 25 | 0       | 0  | 4.3E-02 | 25 |
| GO:0031012 | extracellular matrix                                                  | CC | 5.0E-02 | 20 | 0       | 0  | 7.6E-03 | 40 |
| GO:0016798 | hydrolase activity, acting on glycosyl bonds                          | MF | 0       | 0  | 4.9E-03 | 13 | 3.4E-02 | 13 |
| GO:0051276 | chromosome organization                                               | BP | 0       | 0  | 4.9E-02 | 5  | 6.5E-24 | 38 |
| GO:0000228 | nuclear chromosome                                                    | CC | 0       | 0  | 0       | 0  | 7.8E-14 | 39 |
| GO:0005694 | chromosome                                                            | CC | 0       | 0  | 0       | 0  | 1.6E-10 | 45 |
| GO:0006397 | mRNA processing                                                       | BP | 0       | 0  | 0       | 0  | 2.2E-08 | 30 |
| GO:0007059 | chromosome segregation                                                | BP | 0       | 0  | 0       | 0  | 7.5E-08 | 38 |
| GO:0008134 | transcription factor binding                                          | MF | 0       | 0  | 0       | 0  | 1.3E-07 | 50 |
| GO:0008168 | methyltransferase activity                                            | MF | 0       | 0  | 0       | 0  | 2.3E-07 | 36 |
| GO:0030674 | protein binding, bridging                                             | MF | 0       | 0  | 0       | 0  | 9.6E-07 | 41 |
| GO:0043473 | pigmentation                                                          | BP | 0       | 0  | 0       | 0  | 1.5E-06 | 71 |
| GO:0004386 | helicase activity                                                     | MF | 0       | 0  | 0       | 0  | 9.0E-05 | 29 |
| GO:0016779 | nucleotidyltransferase activity                                       | MF | 0       | 0  | 0       | 0  | 1.9E-04 | 28 |
| GO:0034330 | cell junction organization                                            | BP | 0       | 0  | 0       | 0  | 8.5E-04 | 27 |
| GO:0042393 | histone binding                                                       | MF | 0       | 0  | 0       | 0  | 4.3E-03 | 27 |



857

## 858 Supplementary figures

859

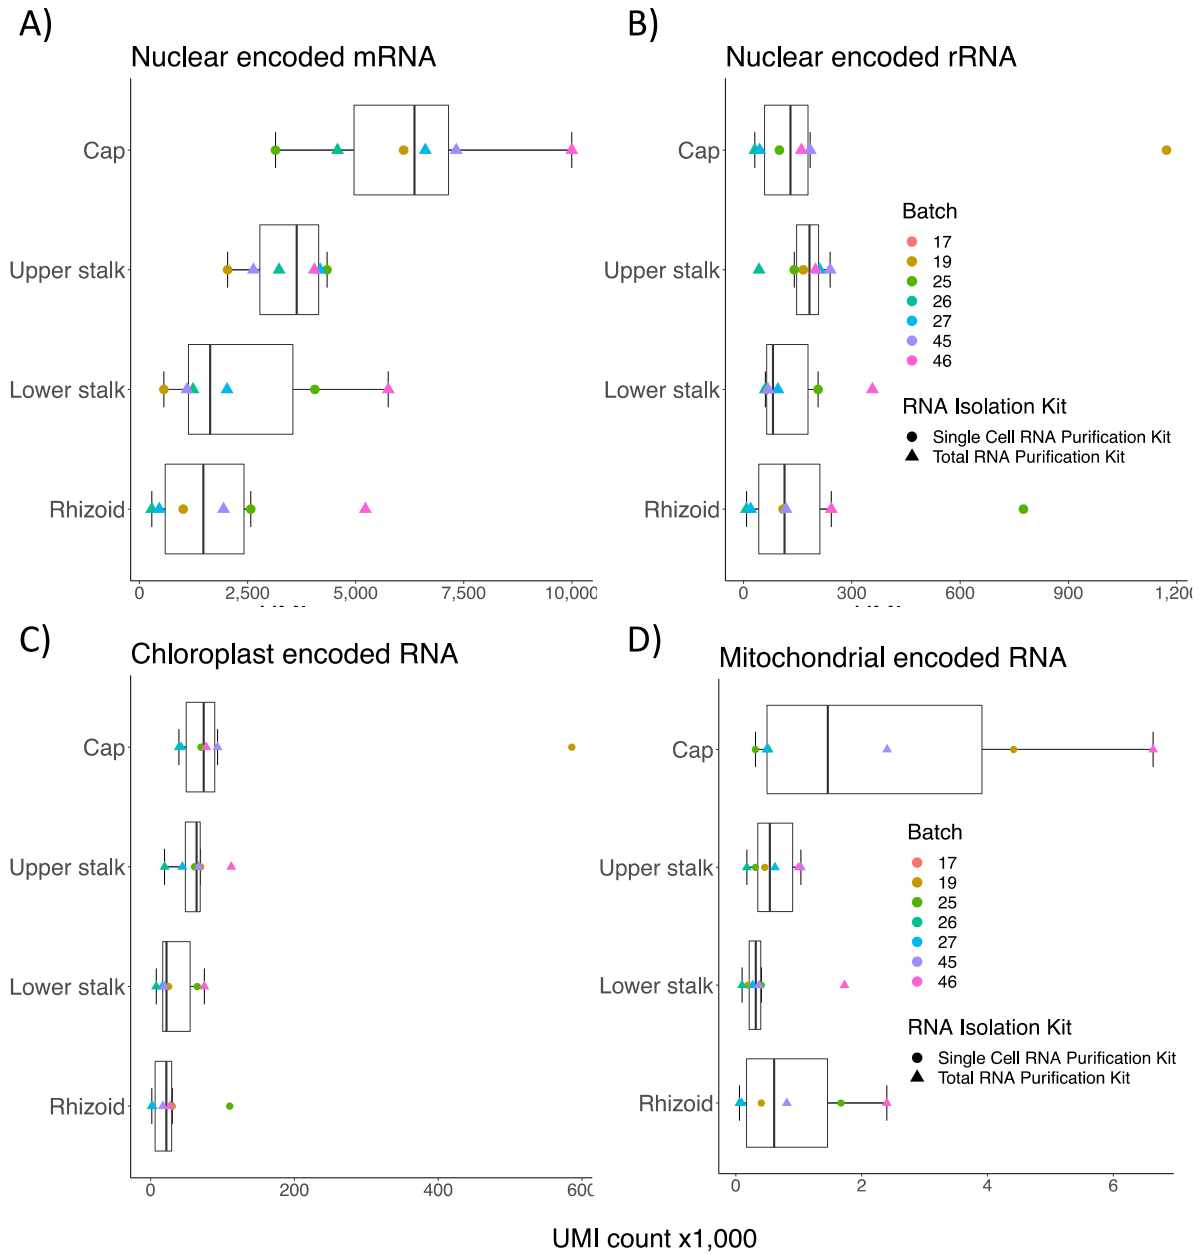

860

861 **Figure S1.** Boxplots showing the summarized gene expression levels (total UMI counts) of **A)** nuclear  
862 encoded mRNA, **B)** nuclear encoded rRNA, **C)** chloroplast encoded RNA and **D)** mitochondrial  
863 encoded RNA

864

865

866

867

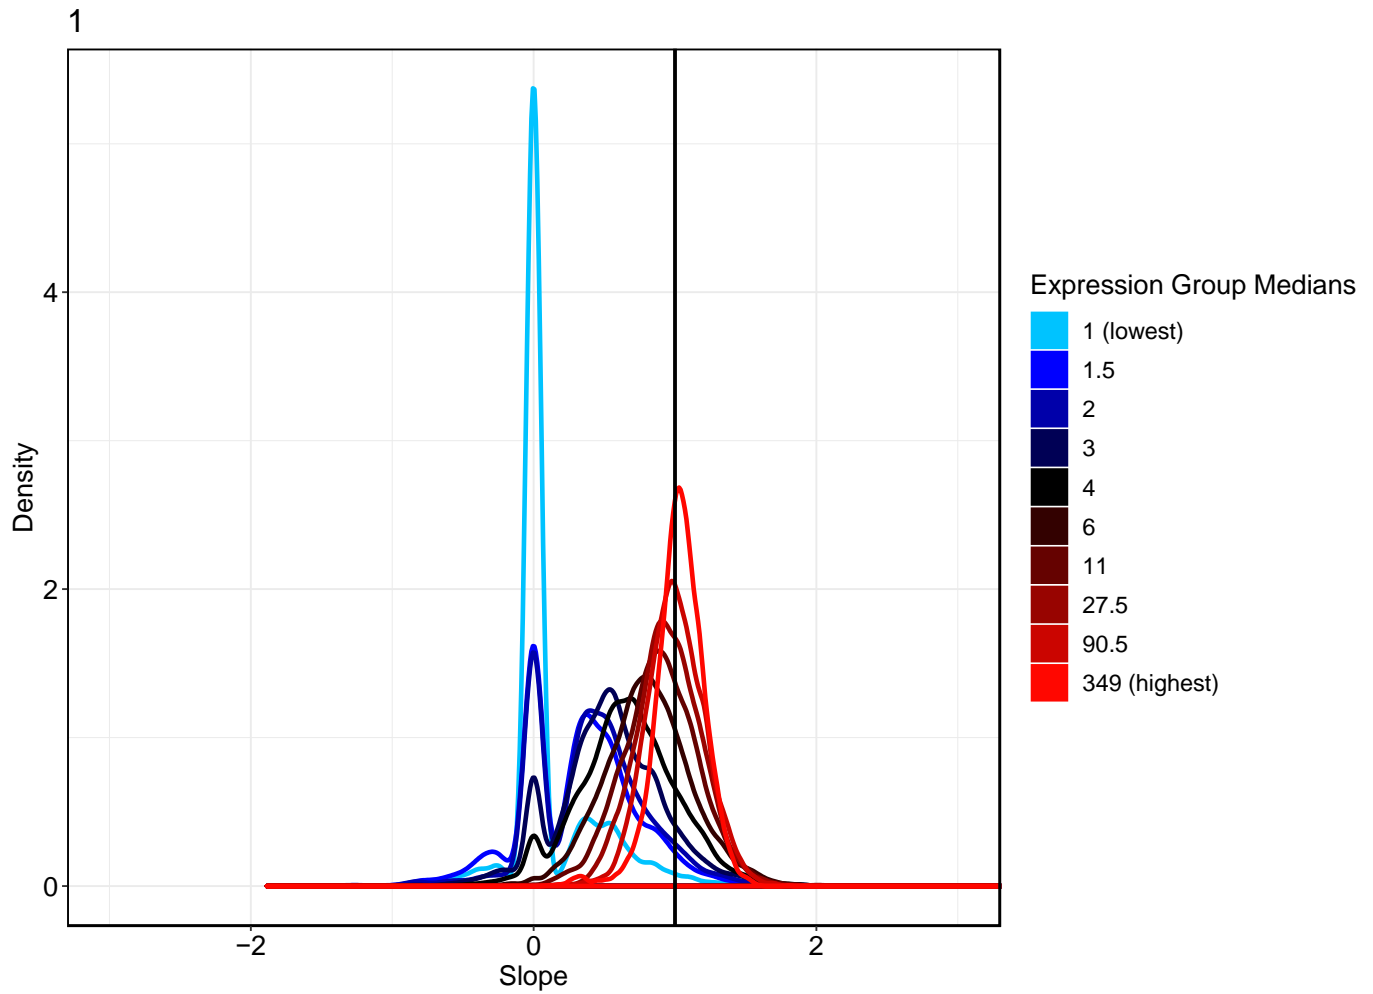

868  
869  
870  
871  
872  
873  
874  
875  
876

**Figure S2.** Density plot generated with the `sc-norm` package in R, displaying the relationship between sequencing depth and gene counts in our samples. Genes are grouped into 10 groups based on gene expression (shown in colors). We see that for the highest expressed genes, the slope of the relationship between expression and sequencing depth is close to 1, justifying the use of normalization based on sequencing depth (as in the DESeq2 R package).

877  
878  
879  
880  
881  
882
